# Supplementary material for: Global epidemiology and patterns of cerebral venous thrombosis: a systematic review and meta-analysis protocol
Source: PubMed Central journal article supplement — BMJ Open. 2018 Apr 7;8(4):e019939. doi: 10.1136/bmjopen-2017-019939 (PMC5892743; doi:10.1136/bmjopen-2017-019939), 2018-04-07
Supplement: bmjopen-2017-019939.draft_revisions.pdf [file bmjopen-2017-019939.draft_revisions.pdf]

# BMJ Open

BMJ Open is committed to open peer review. As part of this commitment we make the peer review history of every article we publish publicly available.

When an article is published we post the peer reviewers' comments and the authors' responses online. We also post the versions of the paper that were used during peer review. These are the versions that the peer review comments apply to.

The versions of the paper that follow are the versions that were submitted during the peer review process. They are not the versions of record or the final published versions. They should not be cited or distributed as the published version of this manuscript.

BMJ Open is an open access journal and the full, final, typeset and author-corrected version of record of the manuscript is available on our site with no access controls, subscription charges or pay-per-view fees (<http://bmjopen.bmj.com>).

If you have any questions on BMJ Open's open peer review process please email [info.bmjopen@bmj.com](mailto:info.bmjopen@bmj.com)

# BMJ Open

## Epidemiology and patterns of cerebral venous thrombosis in low- and middle-income countries: a systematic review and meta-analysis protocol

|                               |                                                                                                                                                                                                                                                                                                                                                                                                                                                 |
|-------------------------------|-------------------------------------------------------------------------------------------------------------------------------------------------------------------------------------------------------------------------------------------------------------------------------------------------------------------------------------------------------------------------------------------------------------------------------------------------|
| Journal:                      | <i>BMJ Open</i>                                                                                                                                                                                                                                                                                                                                                                                                                                 |
| Manuscript ID                 | bmjopen-2017-019939                                                                                                                                                                                                                                                                                                                                                                                                                             |
| Article Type:                 | Protocol                                                                                                                                                                                                                                                                                                                                                                                                                                        |
| Date Submitted by the Author: | 04-Oct-2017                                                                                                                                                                                                                                                                                                                                                                                                                                     |
| Complete List of Authors:     | Danwang, Celestin; Faculty of Medecine and Biomedical Sciences, Surgery and specialities<br>Mazou, Temgoua Ngou ; Faculty of Medecine and Biomedical Sciences, Internal medicine and specialities<br>Tochie, Joel Noutakdie; Universite de Yaounde I Faculte de Medecine et des Sciences Biomedicales,<br>Tankeu, Ronni; FMBS, internal medicinie<br>Bigna, Jean Joel; Centre Pasteur of Cameroon, Department of Epidemiology and Public Health |
| Keywords:                     | Thrombosis, Cerebral Veins, low- and middle-income countries                                                                                                                                                                                                                                                                                                                                                                                    |
|                               |                                                                                                                                                                                                                                                                                                                                                                                                                                                 |

SCHOLARONE™  
Manuscripts

1  
2  
3 **Epidemiology and patterns of cerebral venous thrombosis in low- and middle-income**  
4  
5 **countries: a systematic review and meta-analysis protocol**  
6

7 Celestin Danwang<sup>1\*</sup>, Mazou N. Temgoua<sup>2</sup>, Joël Noutakdie Tochie<sup>1</sup>, Ronni Tankeu<sup>2</sup>, Jean Joël  
8 Bigna<sup>4,5</sup>  
9  
10

11  
12  
13 1. Department of Surgery and Specialties, Faculty of Medicine and Biomedical Sciences,  
14 University of Yaoundé I, Yaoundé, Cameroon.  
15

16  
17 2. Department of Internal Medicine and Specialties, Faculty of Medicine and Biomedical  
18 Sciences, University of Yaoundé I, Yaoundé, Cameroon.  
19

20  
21 3. Department of Epidemiology and Public Health, Centre Pasteur of Cameroon, Yaoundé,  
22 Cameroon.  
23

24  
25 4. School of Public Health, Faculty of Medicine, University of Paris Sud XI, Le Kremlin-  
26 Bicêtre, France.  
27  
28  
29  
30  
31  
32  
33  
34  
35  
36  
37

38 E-mail addresses: CD: danram07@yahoo.fr; MNT: neurotemgoua@yahoo.fr; JNT:  
39 joeltochie@gmail.com; RT: Ronnitank@gmail.com; JJB: bignarimjj@yahoo.fr;  
40  
41  
42  
43

44 \*Corresponding author: Dr. Celestin Danwang, MD.

45 Department of Surgery and Specialties, Faculty of Medicine and Biomedical Sciences,  
46 University of Yaoundé I, Yaoundé, Cameroon.

47 E-mail: danram07@yahoo.fr

48 Phone number: +237696783172  
49  
50  
51  
52  
53  
54  
55  
56  
57  
58  
59  
60

## Abstract

### Introduction

Venous thrombosis can affect all veins in the body including cerebral veins, where it causes cerebral venous thrombosis (CVT). CVT is an aetiology of stroke, particularly in children and young adults. Its clinical features vary widely according to the occluded vessel. In low- and middle-income countries (LMICs), data concerning the epidemiology of CVT are scarce. This protocol for a systematic review and meta-analysis aims to critically synthesize data concerning prevalence, incidence, risk factors, clinical presentation and mortality rate of CVT in people living in LMICs.

### Methods and analysis

MEDLINE, EMBASE, ISI Web of Sciences databases will be searched for relevant abstracts of studies published between the 1<sup>st</sup> of January 1990 and the 31<sup>st</sup> of October 2017, without language restriction in LMICs. After screening of abstracts, study selection, data extraction and assessment of risk of bias, we will assess studies individually for heterogeneity. Random-effect meta-analysis will be then used to pool studies judged to be clinically homogenous. Funnel-plots analysis and Egger's test will be used to detect publication bias. Results will be presented by region (Africa, Americas, Eastern Mediterranean, Europe, South East Asia and Western Pacific).

### Ethics and dissemination

Since the current study will be based on published data, ethical approval is not required. This review is expected to provide relevant data to help in evaluating the burden of CVT in LMICs. The final report of this study will be published in a peer-reviewed journal.

### Protocol and registration:

1  
2  
3 PROSPERO International Prospective Register of systematic reviews, registration number:  
4 CRD42017074266.  
5  
6  
7  
8  
9

10  
11 **Keywords:** Thrombosis; Cerebral Veins; low- and middle-income countries.  
12  
13

### 14 15 16 **Strengths and limitations of the study** 17

- 18  
19 • A limitation to the current review may be the limited amount of data; mainly cases  
20 series done in urban settings which may pose a major restriction to this study, as the  
21 result may not reflect the true burden of cerebral venous thrombosis (CVT) in the  
22 population of low- and middle-income countries (LMICs).  
23  
24
- 25 • This review will be in the best of our knowledge, the first one to summarized available  
26 data on the burden of CVT in LMICs.  
27  
28
- 29 • We plan to use powerful meta-analysis technique to have accurate estimates.  
30  
31  
32  
33  
34  
35  
36  
37  
38  
39  
40  
41  
42  
43  
44  
45  
46  
47  
48  
49  
50  
51  
52  
53  
54  
55  
56  
57

## Introduction

Venous thrombosis can affect all veins in the body including the cerebral venous system leading to cerebral venous thrombosis (CVT)(1). Although rare, CVT is a potential aetiology of stroke, particularly in children and young adults (2, 3). All ages are concerned by this pathology including neonates(2). CVT accounts for 0.5% of all strokes and its annual incidence ranges from three to four cases per million population to up to seven cases per million among the youth worldwide (2, 3), with young adult females being more affected than males. The established risk factors of CVT are ear, nose and facial infections as well as intracranial tumours, pregnancy and the puerperium, systemic diseases, coagulopathies, oral contraceptives, and dehydration(4). The clinical presentation varies widely according to the occluded cerebral vessel (3).

The recent advances in neuroimaging techniques with the vulgarization of magnetic resonance imaging (MRI) even in low- and middle-income countries (LMICs) have made the diagnosis of CVT easier, hence, improving on the overall prognosis of CVT(2). The various therapeutic options are heparin, mechanical thrombectomy, intravenous thrombolytic and decompressive hemicraniectomy(2).

Unlike arterial strokes, there is scant consistent or representative data on CVT-related strokes, especially in LMICs(5) , where most of the population is made up of young people and is therefore at risk of developing CVT. We propose this protocol for a systematic review and meta-analysis to critically synthesis contemporary data on the prevalence, incidence, mortality rate, and risk factors of CVT in LMICs.

## Objective

1  
2  
3 This systematic review and meta-analysis aims at determining the prevalence, incidence, risk  
4 factors and mortality associated with CVT as well as the clinical presentation of this disease  
5 in people living in LMICs.  
6  
7  
8  
9

## 10 **Review questions**

11  
12 Specifically, the proposed systematic review will answer the following questions:

- 13 1. What are the prevalence and incidence of CVT in low- and middle-incomes countries?
- 14 2. What are the risk factors of CVT in this population?
- 15 3. What are the clinical features of CVT in this population?
- 16 4. What is the case-fatality rate due to CVT in this population?

## 17 **Methods and analysis**

18  
19 This systematic review and meta-analysis will be reported in conformity with Meta-analysis  
20 of Observational Studies in Epidemiology (MOOSE) guidelines(6). For the present protocol,  
21 the Preferred Reporting Items for Systematic Review and Meta-Analysis (PRISMA) for  
22 Protocol was used for the reporting(7). An additional file shows the PRISMA for protocol  
23 checklist [see **Additional File 1**].  
24  
25  
26  
27

## 28 **Criteria for considering studies for the review**

### 29 *Inclusion criteria*

- 30 1. We intend to include cross-sectional studies, case-control, cohort studies, and case-series  
31 with at least 30 participants.
- 32 2. Published between January 1<sup>st</sup>, 1990 and October 30<sup>th</sup> 2017, without any language  
33 restriction.
- 34 3. Observational studies with sufficient data on: the prevalence and/or incidence of CVT,  
35 mortality rate, risk factors or clinical pattern in LMICs.

### *Exclusion criteria*

We will exclude:

1. Commentaries, editorials, letters and reviews.
2. Studies with inaccessible full text either online or from the corresponding author.
3. Studies in which relevant data on CVT are impossible to extract.
4. For duplicates, or studies published in more than one report, the one reporting the largest sample size will be considered.

### **Search strategy for identifying relevant studies**

The search strategy will be as follow:

#### *Bibliographic database searches*

1. Excerpta Medica Database (EMBASE), MEDLINE through PubMed, Web of Science (Science Citation Index) databases will be searched for relevant studies concerning CVT in LMICs from January 1<sup>st</sup>, 1990 to October 31<sup>st</sup> 2017, with no language restriction. The researched strategy will be designed for MEDLINE and adapted for other databases, using both text words and medical subject heading terms related to CVT (**Table 1**). In addition, the individual name of all LMICs will also be used as key search terms.
2. Secondly, the abstracts of all eligible articles will be reviewed and full-text articles will be accessed through PubMed, EMBASE, Scopus Database, AJOL, Google Scholar, HINARI, or journals' websites. The authors of papers whose full-text cannot be obtained by internet-based sources will be directly contacted to provide them.

#### *Searching for others sources*



1  
2  
3 The references cited by identified studies will also be searched for additional data source.  
4

### 5 6 **Selection of studies for inclusion in the review**

7  
8 The titles and abstracts of papers obtained from the search will be independently scrutinized  
9  
10 by two reviewers (CD and TNM) using an assessment guide. The full texts of potentially  
11  
12 eligible papers will be retrieved by one reviewer (CD). Thereafter, they will independently  
13  
14 review the full text of each potentially eligible study, compare their results and resolve any  
15  
16 discrepancy by discussion. If agreement is not reached after discussion a third reviewer (JNT)  
17  
18 will be consulted for arbitration.  
19  
20

### 21 22 **Assessment of methodological quality and reporting of data**

23  
24 An adapted version of the Risk of Bias Tool for Prevalence Studies developed by Hoy *et*  
25  
26 *al.*(8), will be used to evaluate included studies for quality and risk of bias, and will be  
27  
28 applied to screened full-text articles by two reviewers.  
29  
30

### 31 32 **Data extraction and management**

33  
34 A data extraction form will be used by two independent reviewers (CD and TNM) to collect  
35  
36 information on the last name of the first author, year of publication, region (Africa, Americas,  
37  
38 Eastern Mediterranean, Europe, South East Asia and Western Pacific), country, study design,  
39  
40 study area (rural versus urban), study setting (intensive care unit, surgery unit, post mortem),  
41  
42 sample size, mean or median age, age range and male proportion, specific characteristics of  
43  
44 the study population (woman on oral contraceptives, patients with HIV, pregnant/post-partum  
45  
46 women and post-operative patients), prevalence, incident and/or mortality rate of CVT and  
47  
48 risk factors or CVT in the study population. For multinational studies, the prevalence,  
49  
50 incidence or mortality will be reported for the individual countries.  
51  
52  
53  
54

### 55 56 **Data synthesis and analysis**

1  
2  
3 When data collection will be complete, a meta-analysis will be conducted. The study-specific  
4 estimates will be pooled by using a random effects meta-analysis model to obtain an overall  
5 summary estimate of the prevalence and/or incidence across studies, after stabilizing the  
6 variance of individual studies with the use of the Freeman-Tukey double arc-sine  
7 transformation(9). Standard errors for the study-specific estimates will be determined from  
8 the point estimate and the appropriate denominators. Heterogeneity will be assessed using the  
9  $\chi^2$  test on Cochrane's Q statistic(10) which is quantified by  $I^2$  values, assuming that  $I^2$  values  
10 of 25%, 50% and 75%, respectively, represent low, medium and high heterogeneity(11). We  
11 will assess the presence of publication bias using funnel plots and Egger's test(12).  
12 Publication bias will be confirmed if  $p$  value on Egger's test  $< 0.10$ . Where substantial  
13 heterogeneity will be detected, subgroup and meta-regression analyses will be performed to  
14 investigate the possible sources of heterogeneity using previously mentioned variables and the  
15 study methodological quality. In case of substantial clinical heterogeneity, a narrative  
16 summary of findings will be done. The inter-rater agreement for study inclusion will be  
17 assessed using Cohen's  $\kappa$  coefficient(13). Data analyses used the 'meta' package of the  
18 statistical software R (version 3.2.2 [2014-08-14], The R Foundation for statistical computing,  
19 Vienna, Austria).

### 40 **Presentation and reporting of results**

41  
42  
43 The study selection process will be summarize by a flow diagram. Quantitative data will be  
44 presented in evidence tables of individual studies as well as in summary tables and forest plots  
45 where appropriate. The quality scores and risk of bias for each eligible study will be reported  
46 accordingly. This may be tabulated and accompanied by narrative summaries.  
47  
48  
49  
50  
51  
52  
53  
54

### 55 **Conclusion**

1  
2  
3 Thrombosis of the cerebral veins and sinus represent one of the causes of stroke, especially in  
4 children and young adults. With the current scarcity of representative epidemiological data on  
5 CVT in resource-limited settings, this systematic review will provide this data so as to inform  
6  
7  
8  
9 policymakers on the burden of this deadly disease in LMICs.  
10

### 11 12 13 14 15 **Ethics and disseminations**

16  
17  
18 The current review will use published studies. Therefore, there is no requirement for ethical  
19 approval. The review is expected to provide the current burden of CVT in LMICs, in order to  
20 inform health authorities and decision makers to elaborate effective preventive strategies to  
21 reduce de burden of CVT in theseresource-challenged settings. The resulting manuscript will  
22  
23  
24  
25  
26  
27 be published in a peer-reviewed journal.  
28  
29  
30  
31  
32  
33  
34  
35  
36  
37  
38

### 39 **Competing interests**

40  
41  
42 None.  
43

### 44 **Funding**

45  
46  
47 None.  
48  
49

### 50 **Authors' Contributions:**

51  
52  
53  
54  
55  
56  
57

1  
2  
3 Had the idea: CD. Designed and conceived the protocol: CD. First draft: CD. Critically  
4 revised the methodology and intellectual content: CD, TNM, JNT, RT and JJB. Guarantor of  
5 the review: JJB. All authors approved the final version of this manuscript.  
6  
7  
8  
9  
10  
11  
12

## 13 References

- 16 1. Heit JA. Epidemiology of venous thromboembolism. *Nat Rev Cardiol* 2015 ;12:464-  
17 74.
- 18 2. Bousser MG, Ferro JM. Cerebral venous thrombosis: an update. *Lancet Neurol* 2007  
19 ;6:162-70.
- 20 3. Stam J. Thrombosis of the cerebral veins and sinuses. *N Engl J Med* 2005 ;352:1791-  
21 8.
- 22 4. Saadatnia M, Fatehi F, Basiri K, Mousavi SA, Mehr GK. Cerebral venous sinus  
23 thrombosis risk factors. *Int J Stroke* 2009 ;4:111-23.
- 24 5. Sidhom Y, Mansour M, Messelmani M, Derbali H, Fekih-Mrissa N, Zaouali J, et al.  
25 Cerebral venous thrombosis: clinical features, risk factors, and long-term outcome in a  
26 Tunisian cohort. *J Stroke Cerebrovasc Dis* 2014 ;23:1291-5.
- 27 6. Stroup DF, Berlin JA, Morton SC, Olkin I, Williamson GD, Rennie D, et al. Meta-  
28 analysis of observational studies in epidemiology: a proposal for reporting. Meta-analysis Of  
29 Observational Studies in Epidemiology (MOOSE) group. *JAMA* 2000 ;283:2008-12.
- 30 7. Moher D, Shamseer L, Clarke M, Ghersi D, Liberati A, Petticrew M, et al. Preferred  
31 reporting items for systematic review and meta-analysis protocols (PRISMA-P) 2015  
32 statement. *Syst Rev* 2015 ;4:1.
- 33 8. Hoy D, Brooks P, Woolf A, Blyth F, March L, Bain C, et al. Assessing risk of bias in  
34 prevalence studies: modification of an existing tool and evidence of interrater agreement. *J*  
35 *Clin Epidemiol* 2012;65:934-9.
- 36 9. Miller JJ. The Inverse of the Freeman – Tukey Double Arcsine Transformation. *The*  
37 *American Statistician* 1978 ;32:138.
- 38 10. Kulinskaya E, Dollinger MB. An accurate test for homogeneity of odds ratios based  
39 on Cochran's Q-statistic. *BMC Med Res Methodol* 2015 ;15:49.
- 40 11. Huedo-Medina TB, Sanchez-Meca J, Marin-Martinez F, Botella J. Assessing  
41 heterogeneity in meta-analysis: Q statistic or I2 index? *Psychol Methods*. 2006;11:193-206.
- 42 12. Egger M, Davey Smith G, Schneider M, Minder C. Bias in meta-analysis detected by a  
43 simple, graphical test. *BMJ* 1997 ;315:629-34.
- 44 13. McHugh ML. Interrater reliability: the kappa statistic. *Biochem Med (Zagreb)*;22:276-  
45 82.  
46  
47  
48  
49  
50  
51  
52  
53  
54  
55  
56  
57  
58  
59  
60

**Table 1: Search strategy for PubMed**

| Search | Search terms                                                                                                                                                                                                                                                                                                                                                                                                                                                                                                                                                                                                                                                                                                                                                                                                                                                                                                                                                                                                                                                                                                                                                                                                                                                                                                                                                                                                                                                                        |
|--------|-------------------------------------------------------------------------------------------------------------------------------------------------------------------------------------------------------------------------------------------------------------------------------------------------------------------------------------------------------------------------------------------------------------------------------------------------------------------------------------------------------------------------------------------------------------------------------------------------------------------------------------------------------------------------------------------------------------------------------------------------------------------------------------------------------------------------------------------------------------------------------------------------------------------------------------------------------------------------------------------------------------------------------------------------------------------------------------------------------------------------------------------------------------------------------------------------------------------------------------------------------------------------------------------------------------------------------------------------------------------------------------------------------------------------------------------------------------------------------------|
| #1     | Cerebral Venous Thrombosis OR Cerebral Vein Thrombosis OR Thrombosis of the cerebral vein and sinus OR Cavernous sinus thrombosis                                                                                                                                                                                                                                                                                                                                                                                                                                                                                                                                                                                                                                                                                                                                                                                                                                                                                                                                                                                                                                                                                                                                                                                                                                                                                                                                                   |
| #2     | (((Afghanistan [tiab] OR Albania [tiab] OR Algeria [tiab] OR American Samoa [tiab] OR Angola [tiab] OR Argentina [tiab] OR Armenia [tiab] OR Azerbaijan [tiab] OR Bangladesh [tiab] OR Belarus [tiab] OR Belize [tiab] OR Benin [tiab] OR Bhutan [tiab] OR Bolivia [tiab] OR Bosnia and Herzegovina [tiab] OR Botswana [tiab] OR Brazil [tiab] OR Bulgaria [tiab] OR Burkina Faso [tiab] OR Burundi [tiab] OR Cabo Verde [tiab] OR Cambodia [tiab] OR Cameroon [tiab] OR “Central African Republic” [tiab] OR Chad [tiab] OR China [tiab] OR Colombia [tiab] OR Comoros [tiab] OR Congo, Dem. Rep. [tiab] OR Congo, Rep. [tiab] OR Costa Rica [tiab] OR "Ivory Coast" [tiab] OR "Cote d'Ivoire" [tiab] OR Cuba [tiab] OR Djibouti [tiab] OR Dominica [tiab] OR “Dominican Republic” [tiab] OR Ecuador [tiab] OR “Egypt”. [tiab] OR El Salvador [tiab] OR “Equatorial Guinea [tiab]” OR Eritrea [tiab] OR Ethiopia [tiab] OR Fiji [tiab] OR Gabon [tiab] OR Gambia [tiab] OR Georgia [tiab] OR Ghana [tiab] OR Grenada [tiab] OR Guatemala [tiab] OR Guinea [tiab] OR Guinea-Bissau [tiab] OR Guyana [tiab] OR Haiti [tiab] OR Honduras [tiab] OR India [tiab] OR Indonesia [tiab] OR Iran, Islamic Rep. [tiab] OR Iraq [tiab] OR Jamaica [tiab] OR Jordan [tiab] OR Kazakhstan [tiab] OR Kenya [tiab] OR Kiribati [tiab] OR “Korea, Dem. People's Rep.” [tiab] OR Kosovo [tiab] OR “Kyrgyz Republic” [tiab] OR Lao PDR [tiab] OR Lebanon [tiab] OR Lesotho [tiab] OR Liberia [tiab] |

|    |                                                                                                                                                                                                                                                                                                                                                                                                                                                                                                                                                                                                                                                                                                                                                                                                                                                                                                                                                                                                                                                                                                                                                                                                                                                                                                                                                                                                                                                                                                                  |
|----|------------------------------------------------------------------------------------------------------------------------------------------------------------------------------------------------------------------------------------------------------------------------------------------------------------------------------------------------------------------------------------------------------------------------------------------------------------------------------------------------------------------------------------------------------------------------------------------------------------------------------------------------------------------------------------------------------------------------------------------------------------------------------------------------------------------------------------------------------------------------------------------------------------------------------------------------------------------------------------------------------------------------------------------------------------------------------------------------------------------------------------------------------------------------------------------------------------------------------------------------------------------------------------------------------------------------------------------------------------------------------------------------------------------------------------------------------------------------------------------------------------------|
|    | <p>OR Libya [tiab] OR Macedonia [tiab] OR Madagascar [tiab] OR Malawi [tiab] OR Malaysia [tiab] OR Maldives [tiab] OR Mali [tiab] OR Marshall Islands [tiab] OR Mauritania [tiab] OR Mauritius [tiab] OR Mexico [tiab] OR Micronesia [tiab] OR Moldova [tiab] OR Mongolia [tiab] OR Montenegro [tiab] OR Morocco [tiab] OR Mozambique [tiab] OR Myanmar [tiab] OR Namibia [tiab] OR Nepal [tiab] OR Nicaragua [tiab] OR Niger [tiab] OR Nigeria [tiab] OR Pakistan [tiab] OR Palau [tiab] OR Panama [tiab] OR Papua New Guinea [tiab] OR Paraguay [tiab] OR Peru [tiab] OR Philippines [tiab] OR Romania [tiab] OR “Russian Federation” [tiab] OR Rwanda [tiab] OR Samoa [tiab] OR “São Tomé and Príncipe” [tiab] OR Senegal [tiab] OR Serbia [tiab] OR “Sierra Leone” [tiab] OR Solomon Islands [tiab] OR Somalia [tiab] OR “South Africa” [tiab] OR South Sudan [tiab] OR Sri Lanka [tiab] OR St. Lucia [tiab] OR St. Vincent and the Grenadines [tiab] OR Sudan [tiab] OR Suriname [tiab] OR Swaziland [tiab] OR Syrian Arab Republic [tiab] OR Tajikistan [tiab] OR Tanzania [tiab] OR Thailand [tiab] OR Timor-Leste [tiab] OR Togo [tiab] OR Tonga [tiab] OR Tunisia [tiab] OR Turkey [tiab] OR Turkmenistan [tiab] OR Tuvalu [tiab] OR Uganda [tiab] OR Ukraine [tiab] OR Uzbekistan [tiab] OR Vanuatu [tiab] OR Venezuela [tiab] OR Vietnam [tiab] OR West Bank and Gaza [tiab] OR Yemen, Rep. [tiab] OR Zambia [tiab] OR Zimbabwe [tiab] NOT ("guinea pig" OR "guinea pigs" OR "aspergillusniger"))</p> |
| #3 | #1 AND #2                                                                                                                                                                                                                                                                                                                                                                                                                                                                                                                                                                                                                                                                                                                                                                                                                                                                                                                                                                                                                                                                                                                                                                                                                                                                                                                                                                                                                                                                                                        |
| #4 | Limits 01/01/1990 to 10/31/2017                                                                                                                                                                                                                                                                                                                                                                                                                                                                                                                                                                                                                                                                                                                                                                                                                                                                                                                                                                                                                                                                                                                                                                                                                                                                                                                                                                                                                                                                                  |

# PRISMA-P 2015 Checklist

This checklist has been adapted for use with systematic review protocol submissions to BioMed Central journals from Table 3 in Moher D et al: Preferred reporting items for systematic review and meta-analysis protocols (PRISMA-P) 2015 statement. *Systematic Reviews* 2015 4:1

An Editorial from the Editors-in-Chief of *Systematic Reviews* details why this checklist was adapted - Moher D, Stewart L & Shekelle P: Implementing PRISMA-P: recommendations for prospective authors. *Systematic Reviews* 2016 5:15

| Section/topic                     | #  | Checklist item                                                                                                                                                                                  | Information reported                |                                     | Page number(s) |
|-----------------------------------|----|-------------------------------------------------------------------------------------------------------------------------------------------------------------------------------------------------|-------------------------------------|-------------------------------------|----------------|
|                                   |    |                                                                                                                                                                                                 | Yes                                 | No                                  |                |
| <b>ADMINISTRATIVE INFORMATION</b> |    |                                                                                                                                                                                                 |                                     |                                     |                |
| <b>Title</b>                      |    |                                                                                                                                                                                                 |                                     |                                     |                |
| Identification                    | 1a | Identify the report as a protocol of a systematic review                                                                                                                                        | <input checked="" type="checkbox"/> | <input type="checkbox"/>            | 1              |
| Update                            | 1b | If the protocol is for an update of a previous systematic review, identify as such                                                                                                              | <input type="checkbox"/>            | <input checked="" type="checkbox"/> |                |
| <b>Registration</b>               | 2  | If registered, provide the name of the registry (e.g., PROSPERO) and registration number in the Abstract                                                                                        | <input checked="" type="checkbox"/> | <input type="checkbox"/>            | 3              |
| <b>Authors</b>                    |    |                                                                                                                                                                                                 |                                     |                                     |                |
| Contact                           | 3a | Provide name, institutional affiliation, and e-mail address of all protocol authors; provide physical mailing address of corresponding author                                                   | <input checked="" type="checkbox"/> | <input type="checkbox"/>            | 1              |
| Contributions                     | 3b | Describe contributions of protocol authors and identify the guarantor of the review                                                                                                             | <input checked="" type="checkbox"/> | <input type="checkbox"/>            | 10             |
| <b>Amendments</b>                 | 4  | If the protocol represents an amendment of a previously completed or published protocol, identify as such and list changes; otherwise, state plan for documenting important protocol amendments | <input type="checkbox"/>            | <input checked="" type="checkbox"/> |                |
| <b>Support</b>                    |    |                                                                                                                                                                                                 |                                     |                                     |                |
| Sources                           | 5a | Indicate sources of financial or other support for the review                                                                                                                                   | <input checked="" type="checkbox"/> | <input type="checkbox"/>            | 9              |
| Sponsor                           | 5b | Provide name for the review funder and/or sponsor                                                                                                                                               | <input checked="" type="checkbox"/> | <input type="checkbox"/>            | 9              |
| Role of sponsor/funder            | 5c | Describe roles of funder(s), sponsor(s), and/or institution(s), if any, in developing the protocol                                                                                              | <input checked="" type="checkbox"/> | <input type="checkbox"/>            | 9              |
| <b>INTRODUCTION</b>               |    |                                                                                                                                                                                                 |                                     |                                     |                |

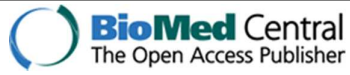

| Section/topic                             | #   | Checklist item                                                                                                                                                                                                            | Information reported                |                          | Page number(s) |
|-------------------------------------------|-----|---------------------------------------------------------------------------------------------------------------------------------------------------------------------------------------------------------------------------|-------------------------------------|--------------------------|----------------|
|                                           |     |                                                                                                                                                                                                                           | Yes                                 | No                       |                |
| <b>Rationale</b>                          | 6   | Describe the rationale for the review in the context of what is already known                                                                                                                                             | <input checked="" type="checkbox"/> | <input type="checkbox"/> | 4              |
| <b>Objectives</b>                         | 7   | Provide an explicit statement of the question(s) the review will address with reference to participants, interventions, comparators, and outcomes (PICO)                                                                  | <input checked="" type="checkbox"/> | <input type="checkbox"/> | 4-5            |
| <b>METHODS</b>                            |     |                                                                                                                                                                                                                           |                                     |                          |                |
| <b>Eligibility criteria</b>               | 8   | Specify the study characteristics (e.g., PICO, study design, setting, time frame) and report characteristics (e.g., years considered, language, publication status) to be used as criteria for eligibility for the review | <input checked="" type="checkbox"/> | <input type="checkbox"/> | 5_6            |
| <b>Information sources</b>                | 9   | Describe all intended information sources (e.g., electronic databases, contact with study authors, trial registers, or other grey literature sources) with planned dates of coverage                                      | <input checked="" type="checkbox"/> | <input type="checkbox"/> | 6-7            |
| <b>Search strategy</b>                    | 10  | Present draft of search strategy to be used for at least one electronic database, including planned limits, such that it could be repeated                                                                                | <input checked="" type="checkbox"/> | <input type="checkbox"/> | 11-12          |
| <b>STUDY RECORDS</b>                      |     |                                                                                                                                                                                                                           |                                     |                          |                |
| Data management                           | 11a | Describe the mechanism(s) that will be used to manage records and data throughout the review                                                                                                                              | <input checked="" type="checkbox"/> | <input type="checkbox"/> | 7              |
| Selection process                         | 11b | State the process that will be used for selecting studies (e.g., two independent reviewers) through each phase of the review (i.e., screening, eligibility, and inclusion in meta-analysis)                               | <input checked="" type="checkbox"/> | <input type="checkbox"/> | 7              |
| Data collection process                   | 11c | Describe planned method of extracting data from reports (e.g., piloting forms, done independently, in duplicate), any processes for obtaining and confirming data from investigators                                      | <input checked="" type="checkbox"/> | <input type="checkbox"/> | 7              |
| <b>Data items</b>                         | 12  | List and define all variables for which data will be sought (e.g., PICO items, funding sources), any pre-planned data assumptions and simplifications                                                                     | <input checked="" type="checkbox"/> | <input type="checkbox"/> | 5              |
| <b>Outcomes and prioritization</b>        | 13  | List and define all outcomes for which data will be sought, including prioritization of main and additional outcomes, with rationale                                                                                      | <input checked="" type="checkbox"/> | <input type="checkbox"/> | 6              |
| <b>Risk of bias in individual studies</b> | 14  | Describe anticipated methods for assessing risk of bias of individual studies, including whether this will be done at the outcome or study level, or both; state how this information will be used in data synthesis      | <input checked="" type="checkbox"/> | <input type="checkbox"/> | 7              |
| <b>DATA</b>                               |     |                                                                                                                                                                                                                           |                                     |                          |                |
| <b>Synthesis</b>                          | 15a | Describe criteria under which study data will be quantitatively synthesized                                                                                                                                               | <input checked="" type="checkbox"/> | <input type="checkbox"/> | 7-8            |
|                                           | 15b | If data are appropriate for quantitative synthesis, describe planned summary measures, methods of                                                                                                                         | <input checked="" type="checkbox"/> | <input type="checkbox"/> | 7-8            |



1  
2  
3  
4  
5  
6  
7  
8  
9  
10  
11  
12  
13  
14  
15  
16  
17  
18  
19  
20  
21  
22  
23  
24  
25  
26  
27  
28  
29  
30  
31  
32  
33  
34  
35  
36  
37  
38  
39  
40  
41  
42  
43  
44  
45  
46  
47

| Section/topic                            | #   | Checklist item                                                                                                                            | Information reported                |                          | Page number(s) |
|------------------------------------------|-----|-------------------------------------------------------------------------------------------------------------------------------------------|-------------------------------------|--------------------------|----------------|
|                                          |     |                                                                                                                                           | Yes                                 | No                       |                |
|                                          |     | handling data, and methods of combining data from studies, including any planned exploration of consistency (e.g., $I^2$ , Kendall's tau) |                                     |                          |                |
|                                          | 15c | Describe any proposed additional analyses (e.g., sensitivity or subgroup analyses, meta-regression)                                       | <input checked="" type="checkbox"/> | <input type="checkbox"/> | 8              |
|                                          | 15d | If quantitative synthesis is not appropriate, describe the type of summary planned                                                        | <input checked="" type="checkbox"/> | <input type="checkbox"/> | 8              |
| <b>Meta-bias(es)</b>                     | 16  | Specify any planned assessment of meta-bias(es) (e.g., publication bias across studies, selective reporting within studies)               | <input checked="" type="checkbox"/> | <input type="checkbox"/> | 8              |
| <b>Confidence in cumulative evidence</b> | 17  | Describe how the strength of the body of evidence will be assessed (e.g., GRADE)                                                          | <input checked="" type="checkbox"/> | <input type="checkbox"/> | 8              |

Peer review only

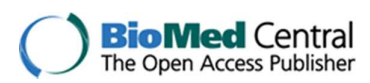

# BMJ Open

## Global epidemiology and patterns of cerebral venous thrombosis: a systematic review and meta-analysis protocol

|                                 |                                                                                                                                                                                                                                                                                                                                                                                                                                                 |
|---------------------------------|-------------------------------------------------------------------------------------------------------------------------------------------------------------------------------------------------------------------------------------------------------------------------------------------------------------------------------------------------------------------------------------------------------------------------------------------------|
| Journal:                        | <i>BMJ Open</i>                                                                                                                                                                                                                                                                                                                                                                                                                                 |
| Manuscript ID                   | bmjopen-2017-019939.R1                                                                                                                                                                                                                                                                                                                                                                                                                          |
| Article Type:                   | Protocol                                                                                                                                                                                                                                                                                                                                                                                                                                        |
| Date Submitted by the Author:   | 24-Jan-2018                                                                                                                                                                                                                                                                                                                                                                                                                                     |
| Complete List of Authors:       | Danwang, Celestin; Faculty of Medecine and Biomedical Sciences, Surgery and specialities<br>Mazou, Temgoua Ngou ; Faculty of Medecine and Biomedical Sciences, Internal medicine and specialities<br>Tochie, Joel Noutakdie; Universite de Yaounde I Faculte de Medecine et des Sciences Biomedicales,<br>Tankeu, Ronni; FMBS, internal medicinie<br>Bigna, Jean Joel; Centre Pasteur of Cameroon, Department of Epidemiology and Public Health |
| <b>Primary Subject Heading</b>: | Cardiovascular medicine                                                                                                                                                                                                                                                                                                                                                                                                                         |
| Secondary Subject Heading:      | Epidemiology, Neurology                                                                                                                                                                                                                                                                                                                                                                                                                         |
| Keywords:                       | Thrombosis, Cerebral Veins, EPIDEMIOLOGY                                                                                                                                                                                                                                                                                                                                                                                                        |
|                                 |                                                                                                                                                                                                                                                                                                                                                                                                                                                 |

SCHOLARONE™  
Manuscripts

Only

1  
2  
3 **Global epidemiology and patterns of cerebral venous thrombosis: a systematic review**  
4  
5 **and meta-analysis protocol**  
6

7  
8 Celestin Danwang<sup>1\*</sup>, Mazou N. Temgoua<sup>2</sup>, Joël Noutakdie Tochie<sup>1</sup>, Ronni Tankeu<sup>2</sup>, Jean Joel  
9 Bigna<sup>4,5</sup>  
10

11  
12  
13 1. Department of Surgery and Specialties, Faculty of Medicine and Biomedical Sciences,  
14 University of Yaoundé I, Yaoundé, Cameroon.  
15

16  
17 2. Department of Internal Medicine and Specialties, Faculty of Medicine and Biomedical  
18 Sciences, University of Yaoundé I, Yaoundé, Cameroon.  
19

20  
21 3. Department of Epidemiology and Public Health, Centre Pasteur of Cameroon, Yaoundé,  
22 Cameroon.  
23

24  
25 4. School of Public Health, Faculty of Medicine, University of Paris Sud XI, Le Kremlin-  
26 Bicêtre, France.  
27  
28  
29  
30  
31  
32  
33  
34  
35  
36  
37

38 E-mail addresses: CD: danram07@yahoo.fr; MNT: neurotemgoua@yahoo.fr; JNT:  
39 joeltochie@gmail.com; RT: Ronnitank@gmail.com; JJB: bignarimjj@yahoo.fr;  
40  
41  
42  
43

44 \*Corresponding author: Dr. Celestin Danwang, MD.

45 Department of Surgery and Specialties, Faculty of Medicine and Biomedical Sciences,  
46 University of Yaoundé I, Yaoundé, Cameroon.

47 E-mail: danram07@yahoo.fr

48 Phone number: +237696783172  
49  
50  
51  
52  
53  
54  
55  
56  
57  
58  
59  
60

## Abstract

### Introduction

Venous thrombosis can affect all veins in the body including cerebral veins, where it causes cerebral venous thrombosis (CVT). CVT is an aetiology of stroke, particularly in children and young adults. Its clinical features vary widely according to the occluded vessel. Data concerning the epidemiology of CVT are scarce. This protocol for a systematic review and meta-analysis aims to critically synthesize data concerning prevalence, incidence, risk factors, clinical presentation, and mortality rate of CVT in the global population.

### Methods and analysis

MEDLINE, EMBASE, ISI Web of Sciences databases will be searched for relevant abstracts of studies published between the 1<sup>st</sup> of January 1990 and the 31<sup>st</sup> of October 2017, without language restriction. After the screening of abstracts, study selection, data extraction and assessment of risk of bias, we will assess studies individually for heterogeneity. Random-effect meta-analysis will be then used to pool studies judged to be clinically homogenous. Funnel-plots analysis and Egger's test will be used to detect publication bias. Results will be presented by region (Africa, America, Europe, Asia and Oceania).

### Ethics and dissemination

Since the current study will be based on published data, ethical approval is not required. This review is expected to provide relevant data to help in evaluating the global burden of CVT. The final report of this study will be published in a peer-reviewed journal.

### Protocol and registration:

PROSPERO International Prospective Register of systematic reviews, registration number: CRD42017074266.

1  
2  
3  
4  
5  
6  
7  
8 **Keywords:** Epidemiology; Thrombosis; Cerebral Veins.  
9

10  
11  
12 **Strengths and limitations of the study**  
13

- 14  
15  
16 • A limitation to the current review may be the scant amount of data; mainly cases series  
17 done in urban settings which may pose a major restriction to this study, as the result  
18 may not reflect the true burden of cerebral venous thrombosis (CVT).  
19  
20  
21  
22 • To the best of our knowledge, this is the first review to summarize available data on  
23 the global burden of CVT.  
24  
25  
26  
27 • We plan to use powerful meta-analysis technique to have accurate estimates.  
28  
29  
30  
31  
32  
33  
34  
35  
36  
37  
38  
39  
40  
41  
42  
43  
44  
45  
46  
47  
48  
49  
50  
51  
52  
53  
54  
55  
56  
57  
58  
59  
60
- Peer review only

## Introduction

Venous thrombosis can affect all veins in the body including the cerebral venous system leading to cerebral venous thrombosis (CVT)(1). Although rare, CVT is a potential aetiology of stroke, particularly in children and young adults (2, 3). All ages are concerned by this pathology including neonates(2). CVT accounts for 0.5% of all strokes and its annual incidence ranges from three to four cases per million population to up to seven cases per million among the youths worldwide (2, 3), with young adult females being more affected than males. The established risk factors for CVT are ear, nose and facial infections as well as intracranial tumours, pregnancy and the puerperium, systemic diseases, coagulopathies, oral contraceptives use, and dehydration(4). The clinical presentation varies widely according to the occluded cerebral vessel (3).

The recent advances in neuroimaging techniques with the vulgarization of magnetic resonance imaging (MRI) even in low- and middle-income countries (LMICs) have made the diagnosis of CVT easier, hence, improving on the overall prognosis of CVT(2). The various therapeutic options are anticoagulation therapy (mainly with heparin), mechanical thrombectomy, intravenous thrombolytic and decompressive hemicraniectomy(2).

The current epidemiological data on CVT is derived from primary studies in which all ethnicities are often not represented making it impossible to appraise the global scene (5, 6). Despite this significant gap in knowledge on the subject, no study has so far focused on global epidemiology and the distribution of risk factors for CVT in different populations worldwide(7). Thus, we propose this protocol for a systematic review and meta-analysis to critically synthesis contemporary data on the prevalence, incidence, mortality rate, and risk factors of CVT in the world.

## Objective

This systematic review and meta-analysis aims at determining the prevalence, incidence, risk factors and mortality associated with CVT as well as the clinical presentation of this disease on a global basis.

## Review questions

Specifically, the proposed systematic review will answer the following questions:

1. What are the global prevalence and incidence of CVT?
2. What are the risk factors of CVT?
3. What are the clinical features (signs and symptoms) of CVT?
4. What is the global case-fatality rate due to CVT?

## Methods and analysis

This systematic review and meta-analysis will be reported in conformity with Meta-analysis of Observational Studies in Epidemiology (MOOSE) guidelines(8). For the present protocol, the Preferred Reporting Items for Systematic Review and Meta-Analysis (PRISMA) for Protocol was used for the reporting(9). **Additional file 1** shows the PRISMA checklist used for this study protocol.

## Criteria for considering studies for the review

### *Inclusion criteria*

1. We intend to include cross-sectional studies, case-control, cohort studies, and case-series with at least 30 participants.
2. All aforementioned studies published between January 1<sup>st</sup>, 1990 and October 31<sup>st</sup>, 2017, without any language restriction.

- 1  
2  
3 3. Observational studies with sufficient data on the prevalence and/or incidence of CVT,  
4 mortality rate, risk factors or clinical pattern.  
5  
6  
7

### 8 ***Exclusion criteria***

9  
10 We will exclude:

- 11  
12  
13 1. Commentaries, editorials, letters and reviews.  
14  
15 2. Studies with inaccessible full text either online or from the corresponding author.  
16  
17 3. Studies in which relevant data on CVT are impossible to extract.  
18  
19 4. For duplicates or studies published in more than one report, the study reporting the  
20 largest sample size will be considered.  
21  
22  
23  
24

### 25 **Search strategy for identifying relevant studies**

26  
27  
28 The search strategy will be as follow:  
29  
30

#### 31 ***Bibliographic database searches***

- 32  
33  
34 1. Excerpta Medica Database (EMBASE), MEDLINE through PubMed, Web of Science  
35 (Science Citation Index) databases will be searched for relevant studies concerning  
36 CVT from January 1<sup>st</sup>, 1990 to October 31<sup>st</sup>, 2017, with no language restriction. The  
37 researched strategy will be designed for MEDLINE and adapted for other databases,  
38 using both text words and medical subject heading terms related to CVT (**Table 1**).  
39  
40  
41 2. Secondly, the abstracts of all eligible articles will be reviewed and full-text articles  
42 will be accessed through PubMed, EMBASE, Scopus Database, AJOL, Google  
43 Scholar, HINARI, or journals' websites. The authors of papers whose full-text will not  
44 be obtained by internet-based sources will be directly contacted to provide them.  
45  
46  
47  
48  
49  
50  
51  
52  
53

#### 54 ***Searching for others sources***



1  
2  
3 The references cited by identified studies will also be searched for additional data source.  
4

### 5 6 **Selection of studies for inclusion in the review**

7  
8 The titles and abstracts of papers obtained from the search will be independently scrutinized  
9  
10 by two reviewers (CD and TNM) using an assessment guide. The full texts of potentially  
11  
12 eligible papers will be retrieved by one reviewer (CD). Thereafter, they will independently  
13  
14 review the full text of each potentially eligible study, compare their results and resolve any  
15  
16 discrepancy by discussion. If an agreement is not reached after discussion, a third reviewer  
17  
18 (JNT) will be consulted for arbitration.  
19  
20

### 21 22 **Assessment of methodological quality and reporting of data**

23  
24 An adapted version of the Risk of Bias Tool for Prevalence Studies developed by Hoy *et*  
25  
26 *al.*(10) [see **Additional File 2**], will be used to evaluate included studies for the quality and  
27  
28 risk of bias and will be applied to screened full-text articles by two reviewers.  
29  
30

### 31 32 **Data extraction and management**

33  
34 A data extraction form [see **Additional File 3**] will be used by two independent reviewers  
35  
36 (CD and TNM) to collect information on the last name of the first author, year of publication,  
37  
38 region (Africa, Americas, Europe, Asia, Oceania), country, study design, study area (rural  
39  
40 versus urban), study setting (intensive care unit, surgery unit, post mortem), sample size,  
41  
42 mean or median age, age range and male proportion, specific characteristics of the study  
43  
44 population (woman on oral contraceptives, patients with HIV, pregnant/post-partum women  
45  
46 and post-operative patients), clinical feature (signs and symptoms), prevalence, incident  
47  
48 and/or mortality rate of CVT and risk factors for CVT in the study population. For  
49  
50 multinational studies, the prevalence, incidence or mortality will be reported for the individual  
51  
52 countries.  
53  
54  
55  
56  
57  
58  
59  
60

### Data synthesis and analysis

When data collection will be complete, a meta-analysis will be conducted. The study-specific estimates will be pooled by using a random-effect meta-analysis model to obtain an overall summary estimate of the prevalence and/or incidence across studies, after stabilizing the variance of individual studies with the use of the Freeman-Tukey double arc-sine transformation(11). Standard errors for the study-specific estimates will be determined from the point estimate and the appropriate denominators. Heterogeneity will be assessed using the  $\chi^2$  test on Cochrane's Q statistic(12) which is quantified by  $I^2$  values, assuming that  $I^2$  values of 25%, 50%, and 75%, respectively, represent low, medium and high heterogeneity(13). We will assess the presence of publication bias using funnel plots and Egger's test(14). Publication bias will be confirmed if  $p$ -value on Egger's test  $< 0.10$ . Where substantial heterogeneity will be detected, subgroup and meta-regression analyses will be performed to investigate the possible sources of heterogeneity using previously mentioned variables and the study methodological quality. In case of substantial clinical heterogeneity, a narrative summary of findings will be done. The inter-rater agreement for study inclusion will be assessed using Cohen's  $\kappa$  coefficient(15). Data analyses will use the 'meta' package of the statistical software R (version 3.2.2 [2014-08-14], The R Foundation for statistical computing, Vienna, Austria).

### Presentation and reporting of results

The study selection process will be summarized in a flow diagram. Quantitative data will be presented in evidence tables of individual studies as well as in summary tables and forest plots where appropriate. The quality scores and risk of bias for each eligible study will be reported accordingly. This may be tabulated and accompanied by narrative summaries.

## Conclusion

Thrombosis of the cerebral veins and sinus represent one of the causes of stroke, especially in children and young adults. With the current scarcity of a global representative epidemiological data on CVT, the findings of this systematic review may help inform policymakers on the global burden of this deadly disease.

## Ethics and disseminations

The current review will use published studies. Therefore, there is no requirement for ethical approval. The review is expected to provide the current global burden of CVT, in order to inform health authorities and decision makers to elaborate effective preventive strategies to reduce the burden of CVT. The resulting manuscript will be published in a peer-reviewed journal.

## Competing interests

None.

## Funding

None.

## Authors' Contributions:

1  
2  
3 Had the idea: CD. Designed and conceived the protocol: CD. First draft: CD. Critically  
4 revised the methodology and intellectual content: CD, TNM, JNT, RT and JJB. Guarantor of  
5 the review: CD and JJB. All authors approved the final version of this manuscript.  
6  
7  
8  
9  
10  
11  
12

## 13 **References**

- 16 1. Heit JA. Epidemiology of venous thromboembolism. *Nat Rev Cardiol*. 2015  
17 Aug;12(8):464-74.
- 18 2. Bousser MG, Ferro JM. Cerebral venous thrombosis: an update. *Lancet Neurol*. 2007  
19 Feb;6(2):162-70.
- 20 3. Stam J. Thrombosis of the cerebral veins and sinuses. *N Engl J Med*. 2005 Apr  
21 28;352(17):1791-8.
- 22 4. Saadatnia M, Fatehi F, Basiri K, Mousavi SA, Mehr GK. Cerebral venous sinus  
23 thrombosis risk factors. *Int J Stroke*. 2009 Apr;4(2):111-23.
- 24 5. Coutinho JM, Zuurbier SM, Aramideh M, Stam J. The incidence of cerebral venous  
25 thrombosis: a cross-sectional study. *Stroke*. 2012 Dec;43(12):3375-7.
- 26 6. Pillai L, Ambike D, Nirhale S, Husainy S, Pataskar S. Cerebral venous thrombosis: An  
27 experience with anticoagulation with low molecular weight heparin. *Indian Journal of Critical*  
28 *Care Medicine*. [Original Article]. 2005 January 1, 2005;9(1):14-8.
- 29 7. Sidhom Y, Mansour M, Messelmani M, Derbali H, Fekih-Mrissa N, Zaouali J, et al.  
30 Cerebral venous thrombosis: clinical features, risk factors, and long-term outcome in a  
31 Tunisian cohort. *J Stroke Cerebrovasc Dis*. 2014 Jul;23(6):1291-5.
- 32 8. Stroup DF, Berlin JA, Morton SC, Olkin I, Williamson GD, Rennie D, et al. Meta-  
33 analysis of observational studies in epidemiology: a proposal for reporting. Meta-analysis Of  
34 Observational Studies in Epidemiology (MOOSE) group. *JAMA*. 2000 Apr 19;283(15):2008-  
35 12.
- 36 9. Moher D, Shamseer L, Clarke M, Ghersi D, Liberati A, Petticrew M, et al. Preferred  
37 reporting items for systematic review and meta-analysis protocols (PRISMA-P) 2015  
38 statement. *Syst Rev*. 2015 Jan 01;4:1.
- 39 10. Hoy D, Brooks P, Woolf A, Blyth F, March L, Bain C, et al. Assessing risk of bias in  
40 prevalence studies: modification of an existing tool and evidence of interrater agreement. *J*  
41 *Clin Epidemiol*. 2012 Sep;65(9):934-9.
- 42 11. Miller JJ. The Inverse of the Freeman – Tukey Double Arcsine Transformation. *The*  
43 *American Statistician*. 1978 1978/11/01;32(4):138-.
- 44 12. Kulinskaya E, Dollinger MB. An accurate test for homogeneity of odds ratios based  
45 on Cochran's Q-statistic. *BMC Med Res Methodol*. 2015 Jun 10;15:49.
- 46 13. Huedo-Medina TB, Sanchez-Meca J, Marin-Martinez F, Botella J. Assessing  
47 heterogeneity in meta-analysis: Q statistic or I<sup>2</sup> index? *Psychol Methods*. 2006 Jun;11(2):193-  
48 206.
- 49 14. Egger M, Davey Smith G, Schneider M, Minder C. Bias in meta-analysis detected by a  
50 simple, graphical test. *BMJ*. 1997 Sep 13;315(7109):629-34.
- 51 15. McHugh ML. Interrater reliability: the kappa statistic. *Biochem Med (Zagreb)*.  
52 2012;22(3):276-82.

1  
2  
3  
4  
5  
6  
7  
8  
9  
10  
11  
12  
13  
14  
15  
16  
17  
18  
19  
20  
21  
22  
23  
24  
25  
26  
27  
28  
29  
30  
31  
32  
33  
34  
35  
36  
37  
38  
39  
40  
41  
42  
43  
44  
45  
46  
47  
48  
49  
50  
51  
52  
53  
54  
55  
56  
57  
58  
59  
60

Table 1: Search strategy for PubMed

| Search | Search terms                                                                                                                      |
|--------|-----------------------------------------------------------------------------------------------------------------------------------|
| #1     | Cerebral Venous Thrombosis OR Cerebral Vein Thrombosis OR Thrombosis of the cerebral vein and sinus OR Cavernous sinus thrombosis |
| #2     | Limits: 01/01/1990 to 10/31/2017; no language restriction                                                                         |
| #3     | # 1 AND # 2                                                                                                                       |

For peer review only

## PRISMA-P 2015 Checklist

This checklist has been adapted for use with systematic review protocol submissions to BioMed Central journals from Table 3 in Moher D et al: Preferred reporting items for systematic review and meta-analysis protocols (PRISMA-P) 2015 statement. *Systematic Reviews* 2015 4:1

An Editorial from the Editors-in-Chief of *Systematic Reviews* details why this checklist was adapted - Moher D, Stewart L & Shekelle P: Implementing PRISMA-P: recommendations for prospective authors. *Systematic Reviews* 2016:5:15

| Section/topic                     | #  | Checklist item                                                                                                                                                                                  | Information reported                |                                     | Page number(s) |
|-----------------------------------|----|-------------------------------------------------------------------------------------------------------------------------------------------------------------------------------------------------|-------------------------------------|-------------------------------------|----------------|
|                                   |    |                                                                                                                                                                                                 | Yes                                 | No                                  |                |
| <b>ADMINISTRATIVE INFORMATION</b> |    |                                                                                                                                                                                                 |                                     |                                     |                |
| <b>Title</b>                      |    |                                                                                                                                                                                                 |                                     |                                     |                |
| Identification                    | 1a | Identify the report as a protocol of a systematic review                                                                                                                                        | <input checked="" type="checkbox"/> | <input type="checkbox"/>            | 1              |
| Update                            | 1b | If the protocol is for an update of a previous systematic review, identify as such                                                                                                              | <input type="checkbox"/>            | <input checked="" type="checkbox"/> |                |
| <b>Registration</b>               | 2  | If registered, provide the name of the registry (e.g., PROSPERO) and registration number in the Abstract                                                                                        | <input checked="" type="checkbox"/> | <input type="checkbox"/>            | 3              |
| <b>Authors</b>                    |    |                                                                                                                                                                                                 |                                     |                                     |                |
| Contact                           | 3a | Provide name, institutional affiliation, and e-mail address of all protocol authors; provide physical mailing address of corresponding author                                                   | <input checked="" type="checkbox"/> | <input type="checkbox"/>            | 1              |
| Contributions                     | 3b | Describe contributions of protocol authors and identify the guarantor of the review                                                                                                             | <input checked="" type="checkbox"/> | <input type="checkbox"/>            | 10             |
| <b>Amendments</b>                 | 4  | If the protocol represents an amendment of a previously completed or published protocol, identify as such and list changes; otherwise, state plan for documenting important protocol amendments | <input type="checkbox"/>            | <input checked="" type="checkbox"/> |                |
| <b>Support</b>                    |    |                                                                                                                                                                                                 |                                     |                                     |                |
| Sources                           | 5a | Indicate sources of financial or other support for the review                                                                                                                                   | <input checked="" type="checkbox"/> | <input type="checkbox"/>            | 9              |
| Sponsor                           | 5b | Provide name for the review funder and/or sponsor                                                                                                                                               | <input checked="" type="checkbox"/> | <input type="checkbox"/>            | 9              |
| Role of sponsor/funder            | 5c | Describe roles of funder(s), sponsor(s), and/or institution(s), if any, in developing the protocol                                                                                              | <input checked="" type="checkbox"/> | <input type="checkbox"/>            | 9              |
| <b>INTRODUCTION</b>               |    |                                                                                                                                                                                                 |                                     |                                     |                |
| <b>Rationale</b>                  | 6  | Describe the rationale for the review in the context of what is already known                                                                                                                   | <input checked="" type="checkbox"/> | <input type="checkbox"/>            | 4              |

| Section/topic                             | #   | Checklist item                                                                                                                                                                                                                              | Information reported                |                          | Page number(s) |
|-------------------------------------------|-----|---------------------------------------------------------------------------------------------------------------------------------------------------------------------------------------------------------------------------------------------|-------------------------------------|--------------------------|----------------|
|                                           |     |                                                                                                                                                                                                                                             | Yes                                 | No                       |                |
| <b>Objectives</b>                         | 7   | Provide an explicit statement of the question(s) the review will address with reference to participants, interventions, comparators, and outcomes (PICO)                                                                                    | <input checked="" type="checkbox"/> | <input type="checkbox"/> | 4-5            |
| <b>METHODS</b>                            |     |                                                                                                                                                                                                                                             |                                     |                          |                |
| <b>Eligibility criteria</b>               | 8   | Specify the study characteristics (e.g., PICO, study design, setting, time frame) and report characteristics (e.g., years considered, language, publication status) to be used as criteria for eligibility for the review                   | <input checked="" type="checkbox"/> | <input type="checkbox"/> | 5_6            |
| <b>Information sources</b>                | 9   | Describe all intended information sources (e.g., electronic databases, contact with study authors, trial registers, or other grey literature sources) with planned dates of coverage                                                        | <input checked="" type="checkbox"/> | <input type="checkbox"/> | 6-7            |
| <b>Search strategy</b>                    | 10  | Present draft of search strategy to be used for at least one electronic database, including planned limits, such that it could be repeated                                                                                                  | <input checked="" type="checkbox"/> | <input type="checkbox"/> | 11-12          |
| <b>STUDY RECORDS</b>                      |     |                                                                                                                                                                                                                                             |                                     |                          |                |
| Data management                           | 11a | Describe the mechanism(s) that will be used to manage records and data throughout the review                                                                                                                                                | <input checked="" type="checkbox"/> | <input type="checkbox"/> | 7              |
| Selection process                         | 11b | State the process that will be used for selecting studies (e.g., two independent reviewers) through each phase of the review (i.e., screening, eligibility, and inclusion in meta-analysis)                                                 | <input checked="" type="checkbox"/> | <input type="checkbox"/> | 7              |
| Data collection process                   | 11c | Describe planned method of extracting data from reports (e.g., piloting forms, done independently, in duplicate), any processes for obtaining and confirming data from investigators                                                        | <input checked="" type="checkbox"/> | <input type="checkbox"/> | 7              |
| <b>Data items</b>                         | 12  | List and define all variables for which data will be sought (e.g., PICO items, funding sources), any pre-planned data assumptions and simplifications                                                                                       | <input checked="" type="checkbox"/> | <input type="checkbox"/> | 5              |
| <b>Outcomes and prioritization</b>        | 13  | List and define all outcomes for which data will be sought, including prioritization of main and additional outcomes, with rationale                                                                                                        | <input checked="" type="checkbox"/> | <input type="checkbox"/> | 6              |
| <b>Risk of bias in individual studies</b> | 14  | Describe anticipated methods for assessing risk of bias of individual studies, including whether this will be done at the outcome or study level, or both; state how this information will be used in data synthesis                        | <input checked="" type="checkbox"/> | <input type="checkbox"/> | 7              |
| <b>DATA</b>                               |     |                                                                                                                                                                                                                                             |                                     |                          |                |
| <b>Synthesis</b>                          | 15a | Describe criteria under which study data will be quantitatively synthesized                                                                                                                                                                 | <input checked="" type="checkbox"/> | <input type="checkbox"/> | 7-8            |
|                                           | 15b | If data are appropriate for quantitative synthesis, describe planned summary measures, methods of handling data, and methods of combining data from studies, including any planned exploration of consistency (e.g., $I^2$ , Kendall's tau) | <input checked="" type="checkbox"/> | <input type="checkbox"/> | 7-8            |

| Section/topic                            | #   | Checklist item                                                                                                              | Information reported                |                          | Page number(s) |
|------------------------------------------|-----|-----------------------------------------------------------------------------------------------------------------------------|-------------------------------------|--------------------------|----------------|
|                                          |     |                                                                                                                             | Yes                                 | No                       |                |
|                                          | 15c | Describe any proposed additional analyses (e.g., sensitivity or subgroup analyses, meta-regression)                         | <input checked="" type="checkbox"/> | <input type="checkbox"/> | 8              |
|                                          | 15d | If quantitative synthesis is not appropriate, describe the type of summary planned                                          | <input checked="" type="checkbox"/> | <input type="checkbox"/> | 8              |
| <b>Meta-bias(es)</b>                     | 16  | Specify any planned assessment of meta-bias(es) (e.g., publication bias across studies, selective reporting within studies) | <input checked="" type="checkbox"/> | <input type="checkbox"/> | 8              |
| <b>Confidence in cumulative evidence</b> | 17  | Describe how the strength of the body of evidence will be assessed (e.g., GRADE)                                            | <input checked="" type="checkbox"/> | <input type="checkbox"/> | 8              |



**Additional File 2. Risk of bias assessment tool for prevalence, incidence and aetiologies outcomes**

| Risk of Bias Item                                                                                                                                                                                                                                                                                                                                                                                                                                                                                                                                  | Answer: Yes (Low Risk) or No (High risk) |
|----------------------------------------------------------------------------------------------------------------------------------------------------------------------------------------------------------------------------------------------------------------------------------------------------------------------------------------------------------------------------------------------------------------------------------------------------------------------------------------------------------------------------------------------------|------------------------------------------|
| <b>External Validity</b>                                                                                                                                                                                                                                                                                                                                                                                                                                                                                                                           |                                          |
| 1. Was the study target population a close representation of the national population in relation to relevant variables?                                                                                                                                                                                                                                                                                                                                                                                                                            |                                          |
| 2. Was the sampling frame a true or close representation of the target population?                                                                                                                                                                                                                                                                                                                                                                                                                                                                 |                                          |
| 3. Was some form of random selection used to select the sample, OR, was a census undertaken?                                                                                                                                                                                                                                                                                                                                                                                                                                                       |                                          |
| 4. Was the likelihood of non-participation bias minimal?                                                                                                                                                                                                                                                                                                                                                                                                                                                                                           |                                          |
| <b>Internal Validity</b>                                                                                                                                                                                                                                                                                                                                                                                                                                                                                                                           |                                          |
| 5. Were data collected directly from the subjects (as opposed to medical records)?                                                                                                                                                                                                                                                                                                                                                                                                                                                                 |                                          |
| 6. Were acceptable case definition of condition used?                                                                                                                                                                                                                                                                                                                                                                                                                                                                                              |                                          |
| 7. Was a reliable and accepted diagnosis method utilized?                                                                                                                                                                                                                                                                                                                                                                                                                                                                                          |                                          |
| 8. Was the same mode of data collection used for all subjects?                                                                                                                                                                                                                                                                                                                                                                                                                                                                                     |                                          |
| 9. Was the length of the shortest prevalence period for the parameter of interest appropriate?                                                                                                                                                                                                                                                                                                                                                                                                                                                     |                                          |
| 10. Were the numerator(s) and denominator(s) for the calculation of the prevalence appropriate?                                                                                                                                                                                                                                                                                                                                                                                                                                                    |                                          |
| 11. Summary item on the overall risk of study bias<br><br>LOW RISK OF BIAS: 8 or more “yes” answers. Further research is very unlikely to change our confidence in the estimate.<br><br>MODERATE RISK OF BIAS: 6 to 7 “yes” answers. Further research is likely to have an important impact on our confidence in the estimate and may change the estimate.<br><br>HIGH RISK OF BIAS: 5 or fewer “yes” answers. Further research is very likely to have an important impact on our confidence in the estimate and is likely to change the estimate. |                                          |

Additional File 3: data extraction form

| First author name | Year of publication | Region | Country | Design | Random sampling | Setting | Area | Age Range (years) | Mean age | Sample Size | %Male | Prevalence of CVT (%) | Incidence of CVT | Mortality rate (%) | Diagnostic method for CVT | Risk factors for CVT | Signs and symptoms | Disease specific to the study population | Risk of bias in methodology | observation |  |
|-------------------|---------------------|--------|---------|--------|-----------------|---------|------|-------------------|----------|-------------|-------|-----------------------|------------------|--------------------|---------------------------|----------------------|--------------------|------------------------------------------|-----------------------------|-------------|--|
|                   |                     |        |         |        |                 |         |      |                   |          |             |       |                       |                  |                    |                           |                      |                    |                                          |                             |             |  |
|                   |                     |        |         |        |                 |         |      |                   |          |             |       |                       |                  |                    |                           |                      |                    |                                          |                             |             |  |
|                   |                     |        |         |        |                 |         |      |                   |          |             |       |                       |                  |                    |                           |                      |                    |                                          |                             |             |  |
|                   |                     |        |         |        |                 |         |      |                   |          |             |       |                       |                  |                    |                           |                      |                    |                                          |                             |             |  |
|                   |                     |        |         |        |                 |         |      |                   |          |             |       |                       |                  |                    |                           |                      |                    |                                          |                             |             |  |
|                   |                     |        |         |        |                 |         |      |                   |          |             |       |                       |                  |                    |                           |                      |                    |                                          |                             |             |  |
|                   |                     |        |         |        |                 |         |      |                   |          |             |       |                       |                  |                    |                           |                      |                    |                                          |                             |             |  |
|                   |                     |        |         |        |                 |         |      |                   |          |             |       |                       |                  |                    |                           |                      |                    |                                          |                             |             |  |
|                   |                     |        |         |        |                 |         |      |                   |          |             |       |                       |                  |                    |                           |                      |                    |                                          |                             |             |  |
|                   |                     |        |         |        |                 |         |      |                   |          |             |       |                       |                  |                    |                           |                      |                    |                                          |                             |             |  |
|                   |                     |        |         |        |                 |         |      |                   |          |             |       |                       |                  |                    |                           |                      |                    |                                          |                             |             |  |
|                   |                     |        |         |        |                 |         |      |                   |          |             |       |                       |                  |                    |                           |                      |                    |                                          |                             |             |  |
|                   |                     |        |         |        |                 |         |      |                   |          |             |       |                       |                  |                    |                           |                      |                    |                                          |                             |             |  |

For peer review only

1  
2  
3  
4  
5  
6  
7  
8  
9  
10  
11  
12  
13  
14  
15  
16  
17  
18  
19  
20  
21  
22  
23  
24  
25  
26  
27  
28  
29  
30  
31  
32  
33  
34  
35  
36  
37  
38  
39  
40  
41  
42  
43  
44  
45  
46  
47

# BMJ Open

## Global epidemiology and patterns of cerebral venous thrombosis: a systematic review and meta-analysis protocol

|                                 |                                                                                                                                                                                                                                                                                                                                                                                                                                                 |
|---------------------------------|-------------------------------------------------------------------------------------------------------------------------------------------------------------------------------------------------------------------------------------------------------------------------------------------------------------------------------------------------------------------------------------------------------------------------------------------------|
| Journal:                        | <i>BMJ Open</i>                                                                                                                                                                                                                                                                                                                                                                                                                                 |
| Manuscript ID                   | bmjopen-2017-019939.R2                                                                                                                                                                                                                                                                                                                                                                                                                          |
| Article Type:                   | Protocol                                                                                                                                                                                                                                                                                                                                                                                                                                        |
| Date Submitted by the Author:   | 28-Feb-2018                                                                                                                                                                                                                                                                                                                                                                                                                                     |
| Complete List of Authors:       | Danwang, Celestin; Faculty of Medecine and Biomedical Sciences, Surgery and specialities<br>Mazou, Temgoua Ngou ; Faculty of Medecine and Biomedical Sciences, Internal medicine and specialities<br>Tochie, Joel Noutakdie; Universite de Yaounde I Faculte de Medecine et des Sciences Biomedicales,<br>Tankeu, Ronni; FMBS, internal medicinie<br>Bigna, Jean Joel; Centre Pasteur of Cameroon, Department of Epidemiology and Public Health |
| <b>Primary Subject Heading</b>: | Cardiovascular medicine                                                                                                                                                                                                                                                                                                                                                                                                                         |
| Secondary Subject Heading:      | Epidemiology, Neurology                                                                                                                                                                                                                                                                                                                                                                                                                         |
| Keywords:                       | Thrombosis, Cerebral Veins, EPIDEMIOLOGY                                                                                                                                                                                                                                                                                                                                                                                                        |
|                                 |                                                                                                                                                                                                                                                                                                                                                                                                                                                 |

SCHOLARONE™  
Manuscripts

Only

1  
2  
3 **Global epidemiology and patterns of cerebral venous thrombosis: a systematic review**  
4  
5 **and meta-analysis protocol**  
6

7 Celestin Danwang<sup>1\*</sup>, Mazou N. Temgoua<sup>2</sup>, Joël Noutakdie Tochie<sup>1</sup>, Ronni Tankeu<sup>2</sup>, Jean Joel  
8 Bigna<sup>4,5</sup>  
9  
10

11  
12 1. Department of Surgery and Specialties, Faculty of Medicine and Biomedical Sciences,  
13 University of Yaoundé I, Yaoundé, Cameroon.  
14

15  
16 2. Department of Internal Medicine and Specialties, Faculty of Medicine and Biomedical  
17 Sciences, University of Yaoundé I, Yaoundé, Cameroon.  
18

19  
20 3. Department of Epidemiology and Public Health, Centre Pasteur of Cameroon, Yaoundé,  
21 Cameroon.  
22

23  
24 4. School of Public Health, Faculty of Medicine, University of Paris Sud XI, Le Kremlin-  
25 Bicêtre, France.  
26

27  
28  
29  
30  
31  
32  
33  
34  
35  
36  
37  
38 E-mail addresses: CD: danram07@yahoo.fr; MNT: neurotemgoua@yahoo.fr; JNT:  
39 joeltochie@gmail.com; RT: Ronnitank@gmail.com; JJB: bignarimjj@yahoo.fr;  
40  
41  
42  
43

44 \*Corresponding author: Dr. Celestin Danwang, MD.

45 Department of Surgery and Specialties, Faculty of Medicine and Biomedical Sciences,  
46 University of Yaoundé I, Yaoundé, Cameroon.

47 E-mail: danram07@yahoo.fr

48 Phone number: +237696783172  
49  
50  
51  
52  
53  
54  
55  
56  
57  
58  
59  
60

## Abstract

### Introduction

Venous thrombosis can affect all veins in the body including cerebral veins, where it causes cerebral venous thrombosis (CVT). CVT is an aetiology of stroke, particularly in children and, young adults. Its clinical features vary widely according to the occluded vessel. Data concerning the epidemiology of CVT is scant. This protocol for a systematic review and meta-analysis aims to critically synthesize data concerning prevalence, incidence, risk factors, anatomical patterns, diagnostic and therapeutic delays, and mortality rate of CVT in the global population.

### Methods and analysis

MEDLINE, EMBASE, ISI Web of Sciences databases will be searched for relevant abstracts of studies published between the 1<sup>st</sup> of January 1990 and the 31<sup>st</sup> of October 2017, without language restriction. After the screening of abstracts, study selection, data extraction and assessment of risk of bias, we will assess studies individually for heterogeneity. Random-effect meta-analysis will then be used to pool studies judged to be clinically homogenous. Funnel-plots analysis and Egger's test will be used to detect publication bias. Results will be presented according to economic level of the various countries (high income versus low- and middle-income countries).

### Ethics and dissemination

Since the current study will be based on published data, ethical approval is not required. This review is expected to provide relevant data to help in evaluating the global burden of CVT. The final report of this study will be published in a peer-reviewed journal.

### Protocol and registration:

1  
2  
3 PROSPERO International Prospective Register of systematic reviews, registration number:  
4 CRD42017074266.  
5  
6  
7  
8  
9

10  
11 **Keywords:** Epidemiology; Thrombosis; Cerebral Veins.  
12  
13

14  
15  
16 **Strengths and limitations of the study**  
17

- 18  
19 • A limitation to the current review may be the scant amount of data; mainly cases series  
20 done in urban settings which may pose a major restriction to this study, as the result  
21 may not reflect the true burden of cerebral venous thrombosis (CVT).  
22  
23  
24  
25 • To the best of our knowledge, this is the first review to summarize available data on  
26 the global burden of CVT.  
27  
28  
29  
30 • The current review will include studies without language restrictions, and thus, will  
31 allow to enroll the maximum of studies published on the topic.  
32  
33  
34  
35  
36  
37  
38  
39  
40  
41  
42  
43  
44  
45  
46  
47  
48  
49  
50  
51  
52  
53  
54  
55  
56  
57  
58  
59  
60

## Introduction

Venous thrombosis can affect all veins in the body including the cerebral venous system leading to cerebral venous thrombosis (CVT) (1). Although rare and affecting all age groups, CVT is a potential aetiology of stroke, particularly in children and, young adults (2, 3). CVT accounts for 0.5% of all strokes and, its annual incidence ranges from three to four cases per million among the general population to up to seven cases per million among the youths (2, 3), with young adult females being more affected than males. The established risk factors for CVT are ear, nose and facial infections as well as intracranial tumours, pregnancy and the puerperium, systemic diseases, coagulopathies, oral contraceptives use, and dehydration (4). The clinical presentation varies widely according to the occluded cerebral vessel (3).

The recent advances in neuroimaging techniques with the widespread use of magnetic resonance imaging (MRI) even in low- and middle-income countries (LMICs) have made the diagnosis of CVT easier, hence, improving on the overall prognosis of patients with CVT (2). The various therapeutic options are anticoagulation therapy (mainly with heparin), mechanical thrombectomy, intravenous thrombolytic and decompressive hemicraniectomy (2).

The current epidemiological data on CVT is derived from primary studies in which all ethnicities are often not represented making it impossible to appraise the global scene (5, 6). Despite this gap in knowledge on the subject matter, till date, no study has focused on the global epidemiology and, the risk factors for CVT in all racial backgrounds and all countries of various income levels (7). Accordingly, we propose this protocol for a systematic review and meta-analysis to critically synthesis contemporary evidence on the occurrence of CVT in the world. The overall research goal is to provide useful data for health authorities.

## Objective

This systematic review and meta-analysis aims at determining the prevalence, incidence, risk factors, anatomical patterns, diagnostic and therapeutic delays and, mortality rate of CVT on a global basis.

## Review questions

Specifically, the proposed systematic review will answer the following questions:

1. What are the global prevalence and, incidence of CVT?
2. What are the risk factors of CVT?
3. What are the neuroimaging features (the various anatomical locations) of CVT?
4. What is the delay between the onset of symptoms, the diagnosis and, initiation of treatment according to the income level (Low- and middle-incomes countries versus high income countries)?
5. What is the global case-fatality rate due to CVT?

## Methods and analysis

This systematic review and meta-analysis will be reported in conformity with Meta-analysis of Observational Studies in Epidemiology (MOOSE) guidelines (8). For the present protocol, the Preferred Reporting Items for Systematic Review and Meta-Analysis (PRISMA) for Protocol was used for the reporting (9). **Additional file 1** shows the PRISMA checklist used for this study protocol.

## Criteria for considering studies for the review

### *Inclusion criteria*



1. We intend to include cross-sectional studies, case-control, cohort studies, and, case-series with at least 30 participants.
2. All aforementioned studies published between January 1<sup>st</sup>, 1990 and October 31<sup>st</sup>, 2017, without any language restriction.
3. Observational studies with sufficient data on the prevalence and/or incidence, risk factors, anatomical patterns, diagnostic and therapeutic delays and mortality rate of CVT.

### ***Exclusion criteria***

We will exclude:

1. Commentaries, editorials, letters and, reviews.
2. Studies with inaccessible full text either online or from the corresponding author.
3. Studies in which relevant data on CVT are impossible to extract.
4. For duplicates or studies published in more than one report, the study reporting the largest sample size will be considered.

### **Search strategy for identifying relevant studies**

The search strategy will be as follow:

#### ***Bibliographic database searches***

1. Excerpta Medica Database (EMBASE), MEDLINE through PubMed, Web of Science (Science Citation Index) databases will be searched for relevant studies concerning CVT from January 1<sup>st</sup>, 1990 to October 31<sup>st</sup>, 2017, with no language restriction. The researched strategy will be designed for MEDLINE and, adapted for other databases, using both text words and, medical subject heading terms related to CVT (**Table 1**).

- 1  
2  
3 2. Secondly, the abstracts of all eligible articles will be reviewed and, full-text articles  
4 will be accessed through PubMed, EMBASE, Scopus Database, AJOL, Google  
5 Scholar, HINARI, or journals' websites. The authors of papers whose full-text will not  
6  
7 be obtained by internet-based sources will be directly contacted to provide them.  
8  
9

### 10 11 12 ***Searching for others sources*** 13

14 The references cited by identified studies will also be searched for additional data source.  
15

### 16 17 18 **Selection of studies for inclusion in the review** 19

20 The titles and, abstracts of papers obtained from the search will be independently scrutinized  
21 by two reviewers (CD and, TNM) using an assessment guide. The full texts of potentially  
22 eligible papers will be retrieved by one reviewer (CD). Thereafter, they will independently  
23 review the full text of each potentially eligible study, compare their results and, resolve any  
24 discrepancy by discussion. If an agreement is not reached after discussion, a third reviewer  
25 (JNT) will be consulted for arbitration.  
26  
27  
28  
29  
30  
31  
32  
33

### 34 35 **Assessment of methodological quality and reporting of data** 36

37 An adapted version of the Risk of Bias Tool for Prevalence Studies developed by Hoy *et al.*  
38 (10) [see **Additional File 2**], will be used to evaluate included studies for the quality and risk  
39 of bias and, will be applied to screened full-text articles by two reviewers.  
40  
41  
42  
43  
44

### 45 46 **Data extraction and management** 47

48 A data extraction form [see **Additional File 3**] will be used by two independent reviewers  
49 (CD and, TNM) to collect information on the last name of the first author, year of publication,  
50 region (Africa, Americas, Europe, Asia, Oceania), country economic level ( high income  
51 versus low- and middle-income countries), country, study design, study area (rural versus  
52  
53  
54  
55  
56  
57  
58  
59  
60

1  
2  
3 urban), study setting (intensive care unit, surgery unit, post mortem), sample size, mean or  
4  
5 median age, age range and, male proportion, specific characteristics of the study population  
6  
7 (woman on oral contraceptives, patients with HIV, pregnant/post-partum women and, post-  
8  
9 operative patients), prevalence rate, incidence rate, anatomical patterns (occluded cerebral  
10  
11 vessel on neuroimaging studies), diagnostic and therapeutic delays ( days or weeks), and/or  
12  
13 mortality rate of CVT and, risk factors for CVT in the study population. For multinational  
14  
15 studies, the prevalence, incidence or mortality will be reported for the individual countries.  
16  
17

### 18 **Data synthesis and analysis**

19  
20  
21 When data collection will be complete, a meta-analysis will be conducted. The study-specific  
22  
23 estimates will be pooled by using a random-effect meta-analysis model to obtain an overall  
24  
25 summary estimate of the prevalence and/or incidence across studies, after stabilizing the  
26  
27 variance of individual studies with the use of the Freeman-Tukey double arc-sine  
28  
29 transformation (11). Standard errors for the study-specific estimates will be determined from  
30  
31 the point estimate and, the appropriate denominators. Heterogeneity will be assessed using the  
32  
33  $\chi^2$  test on Cochrane's Q statistic (12) which is quantified by  $I^2$  values, assuming that  $I^2$  values  
34  
35 of 25%, 50%, and 75%, respectively, represent low, medium and, high heterogeneity (13). We  
36  
37 will assess the presence of publication bias using funnel plots and, Egger's test(14).  
38  
39 Publication bias will be confirmed if  $p$ -value on Egger's test $<0.10$ . Where substantial  
40  
41 heterogeneity will be detected, subgroup and, meta-regression analyses will be performed to  
42  
43 investigate the possible sources of heterogeneity using previously mentioned variables and,  
44  
45 the study methodological quality. In case of substantial clinical heterogeneity, a narrative  
46  
47 summary of findings will be done. The inter-rater agreement for study inclusion will be  
48  
49 assessed using Cohen's  $\kappa$  coefficient (15). Data analyses will use the 'meta' package of the  
50  
51 statistical software R (version 3.2.2 [2014-08-14], The R Foundation for statistical computing,  
52  
53 Vienna, Austria).  
54  
55  
56  
57  
58  
59  
60

## **Presentation and reporting of results**

The study selection process will be summarized in a flow diagram. Quantitative data will be presented in evidence tables of individual studies as well as in summary tables and, forest plots where appropriate. The quality scores and, risk of bias for each eligible study will be reported accordingly. This may be tabulated and, accompanied by narrative summaries.

## **Patient and Public Involvement**

In this study, data will not be collected directly from patients, but in published studies available in main databases.

## **Conclusion**

Thrombosis of the cerebral veins and, sinus represent one of the causes of stroke, especially in children and, young adults. With the current scarcity of a global representative epidemiological data on CVT, the findings of this systematic review may help inform policymakers on the global burden of this deadly disease.

## **Ethics and disseminations**

The current review will use published studies. Therefore, there is no requirement for ethical approval. The review is expected to provide the current global burden of CVT, in order to inform health authorities and, decision makers to elaborate effective preventive strategies to reduce the burden of CVT. The resulting manuscript will be published in a peer-reviewed journal.

### Competing interests

None.

### Funding

None.

### Authors' Contributions:

Had the idea: CD, TNM and JNT. Designed and conceived the protocol: CD, JNT and JJB.  
First draft: CD. Critically revised the methodology and intellectual content: CD, TNM, JNT, RT and JJB. Guarantor of the review: CD and JJB. All authors approved the final version of this manuscript.

### References

1. Heit JA. Epidemiology of venous thromboembolism. *Nat Rev Cardiol.* 2015 Aug;12(8):464-74.
2. Boussier MG, Ferro JM. Cerebral venous thrombosis: an update. *Lancet Neurol.* 2007 Feb;6(2):162-70.
3. Stam J. Thrombosis of the cerebral veins and sinuses. *N Engl J Med.* 2005 Apr 28;352(17):1791-8.
4. Saadatnia M, Fatehi F, Basiri K, Mousavi SA, Mehr GK. Cerebral venous sinus thrombosis risk factors. *Int J Stroke.* 2009 Apr;4(2):111-23.
5. Coutinho JM, Zuurbier SM, Aramideh M, Stam J. The incidence of cerebral venous thrombosis: a cross-sectional study. *Stroke.* 2012 Dec;43(12):3375-7.

6. Pillai L, Ambike D, Nirhale S, Husainy S, Pataskar S. Cerebral venous thrombosis: An experience with anticoagulation with low molecular weight heparin. *Indian Journal of Critical Care Medicine*. [Original Article]. 2005 January 1, 2005;9(1):14-8.
7. Sidhom Y, Mansour M, Messelmani M, Derbali H, Fekih-Mrissa N, Zaouali J, et al. Cerebral venous thrombosis: clinical features, risk factors, and long-term outcome in a Tunisian cohort. *J Stroke Cerebrovasc Dis*. 2014 Jul;23(6):1291-5.
8. Stroup DF, Berlin JA, Morton SC, Olkin I, Williamson GD, Rennie D, et al. Meta-analysis of observational studies in epidemiology: a proposal for reporting. Meta-analysis Of Observational Studies in Epidemiology (MOOSE) group. *JAMA*. 2000 Apr 19;283(15):2008-12.
9. Moher D, Shamseer L, Clarke M, Ghersi D, Liberati A, Petticrew M, et al. Preferred reporting items for systematic review and meta-analysis protocols (PRISMA-P) 2015 statement. *Syst Rev*. 2015 Jan 01;4:1.
10. Hoy D, Brooks P, Woolf A, Blyth F, March L, Bain C, et al. Assessing risk of bias in prevalence studies: modification of an existing tool and evidence of interrater agreement. *J Clin Epidemiol*. 2012 Sep;65(9):934-9.
11. Miller JJ. The Inverse of the Freeman – Tukey Double Arcsine Transformation. *The American Statistician*. 1978 1978/11/01;32(4):138-.
12. Kulinskaya E, Dollinger MB. An accurate test for homogeneity of odds ratios based on Cochran's Q-statistic. *BMC Med Res Methodol*. 2015 Jun 10;15:49.
13. Huedo-Medina TB, Sanchez-Meca J, Marin-Martinez F, Botella J. Assessing heterogeneity in meta-analysis: Q statistic or I2 index? *Psychol Methods*. 2006 Jun;11(2):193-206.
14. Egger M, Davey Smith G, Schneider M, Minder C. Bias in meta-analysis detected by a simple, graphical test. *BMJ*. 1997 Sep 13;315(7109):629-34.
15. McHugh ML. Interrater reliability: the kappa statistic. *Biochem Med (Zagreb)*. 2012;22(3):276-82.

Table 1: Search strategy for PubMed

| Search | Search terms                                                                                                                      |
|--------|-----------------------------------------------------------------------------------------------------------------------------------|
| #1     | Cerebral Venous Thrombosis OR Cerebral Vein Thrombosis OR Thrombosis of the cerebral vein and sinus OR Cavernous sinus thrombosis |
| #2     | Limits: 01/01/1990 to 10/31/2017; no language restriction                                                                         |
| #3     | # 1 AND # 2                                                                                                                       |

## PRISMA-P 2015 Checklist

This checklist has been adapted for use with systematic review protocol submissions to BioMed Central journals from Table 3 in Moher D et al: Preferred reporting items for systematic review and meta-analysis protocols (PRISMA-P) 2015 statement. *Systematic Reviews* 2015 4:1

An Editorial from the Editors-in-Chief of *Systematic Reviews* details why this checklist was adapted - Moher D, Stewart L & Shekelle P: Implementing PRISMA-P: recommendations for prospective authors. *Systematic Reviews* 2016 5:15

| Section/topic                     | #  | Checklist item                                                                                                                                                                                  | Information reported                |                                     | Page number(s) |
|-----------------------------------|----|-------------------------------------------------------------------------------------------------------------------------------------------------------------------------------------------------|-------------------------------------|-------------------------------------|----------------|
|                                   |    |                                                                                                                                                                                                 | Yes                                 | No                                  |                |
| <b>ADMINISTRATIVE INFORMATION</b> |    |                                                                                                                                                                                                 |                                     |                                     |                |
| <b>Title</b>                      |    |                                                                                                                                                                                                 |                                     |                                     |                |
| Identification                    | 1a | Identify the report as a protocol of a systematic review                                                                                                                                        | <input checked="" type="checkbox"/> | <input type="checkbox"/>            | 1              |
| Update                            | 1b | If the protocol is for an update of a previous systematic review, identify as such                                                                                                              | <input type="checkbox"/>            | <input checked="" type="checkbox"/> |                |
| <b>Registration</b>               | 2  | If registered, provide the name of the registry (e.g., PROSPERO) and registration number in the Abstract                                                                                        | <input checked="" type="checkbox"/> | <input type="checkbox"/>            | 3              |
| <b>Authors</b>                    |    |                                                                                                                                                                                                 |                                     |                                     |                |
| Contact                           | 3a | Provide name, institutional affiliation, and e-mail address of all protocol authors; provide physical mailing address of corresponding author                                                   | <input checked="" type="checkbox"/> | <input type="checkbox"/>            | 1              |
| Contributions                     | 3b | Describe contributions of protocol authors and identify the guarantor of the review                                                                                                             | <input checked="" type="checkbox"/> | <input type="checkbox"/>            | 10             |
| <b>Amendments</b>                 | 4  | If the protocol represents an amendment of a previously completed or published protocol, identify as such and list changes; otherwise, state plan for documenting important protocol amendments | <input type="checkbox"/>            | <input checked="" type="checkbox"/> |                |
| <b>Support</b>                    |    |                                                                                                                                                                                                 |                                     |                                     |                |
| Sources                           | 5a | Indicate sources of financial or other support for the review                                                                                                                                   | <input checked="" type="checkbox"/> | <input type="checkbox"/>            | 9              |
| Sponsor                           | 5b | Provide name for the review funder and/or sponsor                                                                                                                                               | <input checked="" type="checkbox"/> | <input type="checkbox"/>            | 9              |
| Role of sponsor/funder            | 5c | Describe roles of funder(s), sponsor(s), and/or institution(s), if any, in developing the protocol                                                                                              | <input checked="" type="checkbox"/> | <input type="checkbox"/>            | 9              |
| <b>INTRODUCTION</b>               |    |                                                                                                                                                                                                 |                                     |                                     |                |
| <b>Rationale</b>                  | 6  | Describe the rationale for the review in the context of what is already known                                                                                                                   | <input checked="" type="checkbox"/> | <input type="checkbox"/>            | 4              |

| Section/topic                             | #   | Checklist item                                                                                                                                                                                                                              | Information reported                |                          | Page number(s) |
|-------------------------------------------|-----|---------------------------------------------------------------------------------------------------------------------------------------------------------------------------------------------------------------------------------------------|-------------------------------------|--------------------------|----------------|
|                                           |     |                                                                                                                                                                                                                                             | Yes                                 | No                       |                |
| <b>Objectives</b>                         | 7   | Provide an explicit statement of the question(s) the review will address with reference to participants, interventions, comparators, and outcomes (PICO)                                                                                    | <input checked="" type="checkbox"/> | <input type="checkbox"/> | 4-5            |
| <b>METHODS</b>                            |     |                                                                                                                                                                                                                                             |                                     |                          |                |
| <b>Eligibility criteria</b>               | 8   | Specify the study characteristics (e.g., PICO, study design, setting, time frame) and report characteristics (e.g., years considered, language, publication status) to be used as criteria for eligibility for the review                   | <input checked="" type="checkbox"/> | <input type="checkbox"/> | 5_6            |
| <b>Information sources</b>                | 9   | Describe all intended information sources (e.g., electronic databases, contact with study authors, trial registers, or other grey literature sources) with planned dates of coverage                                                        | <input checked="" type="checkbox"/> | <input type="checkbox"/> | 6-7            |
| <b>Search strategy</b>                    | 10  | Present draft of search strategy to be used for at least one electronic database, including planned limits, such that it could be repeated                                                                                                  | <input checked="" type="checkbox"/> | <input type="checkbox"/> | 11-12          |
| <b>STUDY RECORDS</b>                      |     |                                                                                                                                                                                                                                             |                                     |                          |                |
| Data management                           | 11a | Describe the mechanism(s) that will be used to manage records and data throughout the review                                                                                                                                                | <input checked="" type="checkbox"/> | <input type="checkbox"/> | 7              |
| Selection process                         | 11b | State the process that will be used for selecting studies (e.g., two independent reviewers) through each phase of the review (i.e., screening, eligibility, and inclusion in meta-analysis)                                                 | <input checked="" type="checkbox"/> | <input type="checkbox"/> | 7              |
| Data collection process                   | 11c | Describe planned method of extracting data from reports (e.g., piloting forms, done independently, in duplicate), any processes for obtaining and confirming data from investigators                                                        | <input checked="" type="checkbox"/> | <input type="checkbox"/> | 7              |
| <b>Data items</b>                         | 12  | List and define all variables for which data will be sought (e.g., PICO items, funding sources), any pre-planned data assumptions and simplifications                                                                                       | <input checked="" type="checkbox"/> | <input type="checkbox"/> | 5              |
| <b>Outcomes and prioritization</b>        | 13  | List and define all outcomes for which data will be sought, including prioritization of main and additional outcomes, with rationale                                                                                                        | <input checked="" type="checkbox"/> | <input type="checkbox"/> | 6              |
| <b>Risk of bias in individual studies</b> | 14  | Describe anticipated methods for assessing risk of bias of individual studies, including whether this will be done at the outcome or study level, or both; state how this information will be used in data synthesis                        | <input checked="" type="checkbox"/> | <input type="checkbox"/> | 7              |
| <b>DATA</b>                               |     |                                                                                                                                                                                                                                             |                                     |                          |                |
| <b>Synthesis</b>                          | 15a | Describe criteria under which study data will be quantitatively synthesized                                                                                                                                                                 | <input checked="" type="checkbox"/> | <input type="checkbox"/> | 7-8            |
|                                           | 15b | If data are appropriate for quantitative synthesis, describe planned summary measures, methods of handling data, and methods of combining data from studies, including any planned exploration of consistency (e.g., $I^2$ , Kendall's tau) | <input checked="" type="checkbox"/> | <input type="checkbox"/> | 7-8            |



| Section/topic                            | #   | Checklist item                                                                                                              | Information reported                |                          | Page number(s) |
|------------------------------------------|-----|-----------------------------------------------------------------------------------------------------------------------------|-------------------------------------|--------------------------|----------------|
|                                          |     |                                                                                                                             | Yes                                 | No                       |                |
|                                          | 15c | Describe any proposed additional analyses (e.g., sensitivity or subgroup analyses, meta-regression)                         | <input checked="" type="checkbox"/> | <input type="checkbox"/> | 8              |
|                                          | 15d | If quantitative synthesis is not appropriate, describe the type of summary planned                                          | <input checked="" type="checkbox"/> | <input type="checkbox"/> | 8              |
| <b>Meta-bias(es)</b>                     | 16  | Specify any planned assessment of meta-bias(es) (e.g., publication bias across studies, selective reporting within studies) | <input checked="" type="checkbox"/> | <input type="checkbox"/> | 8              |
| <b>Confidence in cumulative evidence</b> | 17  | Describe how the strength of the body of evidence will be assessed (e.g., GRADE)                                            | <input checked="" type="checkbox"/> | <input type="checkbox"/> | 8              |

**Additional File 2. Risk of bias assessment tool for prevalence, incidence and aetiologies outcomes**

| Risk of Bias Item                                                                                                                                                                                                                                                                                                                                                                                                                                                                                                                                  | Answer: Yes (Low Risk) or No (High risk) |
|----------------------------------------------------------------------------------------------------------------------------------------------------------------------------------------------------------------------------------------------------------------------------------------------------------------------------------------------------------------------------------------------------------------------------------------------------------------------------------------------------------------------------------------------------|------------------------------------------|
| <b>External Validity</b>                                                                                                                                                                                                                                                                                                                                                                                                                                                                                                                           |                                          |
| 1. Was the study target population a close representation of the national population in relation to relevant variables?                                                                                                                                                                                                                                                                                                                                                                                                                            |                                          |
| 2. Was the sampling frame a true or close representation of the target population?                                                                                                                                                                                                                                                                                                                                                                                                                                                                 |                                          |
| 3. Was some form of random selection used to select the sample, OR, was a census undertaken?                                                                                                                                                                                                                                                                                                                                                                                                                                                       |                                          |
| 4. Was the likelihood of non-participation bias minimal?                                                                                                                                                                                                                                                                                                                                                                                                                                                                                           |                                          |
| <b>Internal Validity</b>                                                                                                                                                                                                                                                                                                                                                                                                                                                                                                                           |                                          |
| 5. Were data collected directly from the subjects (as opposed to medical records)?                                                                                                                                                                                                                                                                                                                                                                                                                                                                 |                                          |
| 6. Were acceptable case definition of condition used?                                                                                                                                                                                                                                                                                                                                                                                                                                                                                              |                                          |
| 7. Was a reliable and accepted diagnosis method utilized?                                                                                                                                                                                                                                                                                                                                                                                                                                                                                          |                                          |
| 8. Was the same mode of data collection used for all subjects?                                                                                                                                                                                                                                                                                                                                                                                                                                                                                     |                                          |
| 9. Was the length of the shortest prevalence period for the parameter of interest appropriate?                                                                                                                                                                                                                                                                                                                                                                                                                                                     |                                          |
| 10. Were the numerator(s) and denominator(s) for the calculation of the prevalence appropriate?                                                                                                                                                                                                                                                                                                                                                                                                                                                    |                                          |
| 11. Summary item on the overall risk of study bias<br><br>LOW RISK OF BIAS: 8 or more “yes” answers. Further research is very unlikely to change our confidence in the estimate.<br><br>MODERATE RISK OF BIAS: 6 to 7 “yes” answers. Further research is likely to have an important impact on our confidence in the estimate and may change the estimate.<br><br>HIGH RISK OF BIAS: 5 or fewer “yes” answers. Further research is very likely to have an important impact on our confidence in the estimate and is likely to change the estimate. |                                          |

Additional File 3: data extraction form

| First author name | Year of publication | Region | Country | Design | Random sampling | Setting | Area | Age Range (years) | Mean age | Sample Size | %Male | Prevalence of CVT (%) | Incidence of CVT | Mortality rate (%) | Diagnostic method for CVT | Risk factors for CVT | Signs and symptoms | Disease specific to the study population | Risk of bias in methodology | observation |  |
|-------------------|---------------------|--------|---------|--------|-----------------|---------|------|-------------------|----------|-------------|-------|-----------------------|------------------|--------------------|---------------------------|----------------------|--------------------|------------------------------------------|-----------------------------|-------------|--|
|                   |                     |        |         |        |                 |         |      |                   |          |             |       |                       |                  |                    |                           |                      |                    |                                          |                             |             |  |
|                   |                     |        |         |        |                 |         |      |                   |          |             |       |                       |                  |                    |                           |                      |                    |                                          |                             |             |  |
|                   |                     |        |         |        |                 |         |      |                   |          |             |       |                       |                  |                    |                           |                      |                    |                                          |                             |             |  |
|                   |                     |        |         |        |                 |         |      |                   |          |             |       |                       |                  |                    |                           |                      |                    |                                          |                             |             |  |
|                   |                     |        |         |        |                 |         |      |                   |          |             |       |                       |                  |                    |                           |                      |                    |                                          |                             |             |  |
|                   |                     |        |         |        |                 |         |      |                   |          |             |       |                       |                  |                    |                           |                      |                    |                                          |                             |             |  |
|                   |                     |        |         |        |                 |         |      |                   |          |             |       |                       |                  |                    |                           |                      |                    |                                          |                             |             |  |
|                   |                     |        |         |        |                 |         |      |                   |          |             |       |                       |                  |                    |                           |                      |                    |                                          |                             |             |  |
|                   |                     |        |         |        |                 |         |      |                   |          |             |       |                       |                  |                    |                           |                      |                    |                                          |                             |             |  |

For peer review only
