# Supplementary material for: Global epidemiology and patterns of cerebral venous thrombosis: a systematic review and meta-analysis protocol
Source: PubMed Central journal article supplement — BMJ Open. 2018 Apr 7;8(4):e019939. doi: 10.1136/bmjopen-2017-019939 (PMC5892743; doi:10.1136/bmjopen-2017-019939), 2018-04-07
Supplement: bmjopen-2017-019939supp002.pdf [file bmjopen-2017-019939supp002.pdf]

**Additional File 2. Risk of bias assessment tool for prevalence, incidence and aetiologies outcomes**

| Risk of Bias Item                                                                                                                                                                                                                                                                                                                                                                                                                                                                                                                                         | Answer: Yes (Low Risk) or No (High risk) |
|-----------------------------------------------------------------------------------------------------------------------------------------------------------------------------------------------------------------------------------------------------------------------------------------------------------------------------------------------------------------------------------------------------------------------------------------------------------------------------------------------------------------------------------------------------------|------------------------------------------|
| <b>External Validity</b>                                                                                                                                                                                                                                                                                                                                                                                                                                                                                                                                  |                                          |
| 1. Was the study target population a close representation of the national population in relation to relevant variables?                                                                                                                                                                                                                                                                                                                                                                                                                                   |                                          |
| 2. Was the sampling frame a true or close representation of the target population?                                                                                                                                                                                                                                                                                                                                                                                                                                                                        |                                          |
| 3. Was some form of random selection used to select the sample, OR, was a census undertaken?                                                                                                                                                                                                                                                                                                                                                                                                                                                              |                                          |
| 4. Was the likelihood of non-participation bias minimal?                                                                                                                                                                                                                                                                                                                                                                                                                                                                                                  |                                          |
| <b>Internal Validity</b>                                                                                                                                                                                                                                                                                                                                                                                                                                                                                                                                  |                                          |
| 5. Were data collected directly from the subjects (as opposed to medical records)?                                                                                                                                                                                                                                                                                                                                                                                                                                                                        |                                          |
| 6. Were acceptable case definition of condition used?                                                                                                                                                                                                                                                                                                                                                                                                                                                                                                     |                                          |
| 7. Was a reliable and accepted diagnosis method utilized?                                                                                                                                                                                                                                                                                                                                                                                                                                                                                                 |                                          |
| 8. Was the same mode of data collection used for all subjects?                                                                                                                                                                                                                                                                                                                                                                                                                                                                                            |                                          |
| 9. Was the length of the shortest prevalence period for the parameter of interest appropriate?                                                                                                                                                                                                                                                                                                                                                                                                                                                            |                                          |
| 10. Were the numerator(s) and denominator(s) for the calculation of the prevalence appropriate?                                                                                                                                                                                                                                                                                                                                                                                                                                                           |                                          |
| <p>11. Summary item on the overall risk of study bias</p> <p>LOW RISK OF BIAS: 8 or more “yes” answers. Further research is very unlikely to change our confidence in the estimate.</p> <p>MODERATE RISK OF BIAS: 6 to 7 “yes” answers. Further research is likely to have an important impact on our confidence in the estimate and may change the estimate.</p> <p>HIGH RISK OF BIAS: 5 or fewer “yes” answers. Further research is very likely to have an important impact on our confidence in the estimate and is likely to change the estimate.</p> |                                          |
